# Supplementary material
Source: Royal Society of Chemistry journal article supplement (doi:10.1039/d6su00127k)

## Table of Contents

|                                                                                                                       |    |
|-----------------------------------------------------------------------------------------------------------------------|----|
| NMR spectra and calculations .....                                                                                    | 2  |
| I. Interpretation of NMR for transesterification of DMT with 2,3-BDO to P23BT (example).                              | 2  |
| II. 2,3-BDO 78% used for La & Zn polymerization experiments .....                                                     | 3  |
| III. DMT, 2,3-BDO & La(acac) <sub>3</sub> catalyst for P23BT synthesis: 1H NMR over time.....                         | 4  |
| IV. DMT, 2,3-BDO & Zn(OAc) <sub>2</sub> •2H <sub>2</sub> O catalyst for P23BT synthesis: 1H NMR over time.....        | 6  |
| V. DMT, Meso 2,3-BDO & Zr(OBu) <sub>4</sub> catalyst for P23BT synthesis: 1H NMR Spectra of samples over time .....   | 8  |
| VI. DMT, R,R-2,3-BDO & Zr(OBu) <sub>4</sub> catalyst for P23BT synthesis: 1H NMR Spectra of samples over time .....   | 10 |
| VII. DMT, Meso 2,3-BDO & Ti(OBu) <sub>4</sub> catalyst for P23BT synthesis: 1H NMR Spectra of samples over time ..... | 12 |
| VIII. DMT, R,R-2,3-BDO & Ti(OBu) <sub>4</sub> catalyst for P23BT synthesis: 1H NMR Spectra of samples over time ..... | 14 |
| IX. Converted integrals for data conversion graph.....                                                                | 15 |
| X. Side products .....                                                                                                | 16 |
| XI. Interpretation spectra of catalyst study using phenylbenzoate and meso- or R,R-2,3-BDO. 17                        |    |
| XII. Spectra of catalyst study using phenylbenzoate and meso or R,R-2,3-BDO, various catalysts                        | 18 |
| Experimental: exact weight of starting materials in vials.....                                                        | 19 |
| Experimental: exact weight of starting materials polyester synthesis .....                                            | 20 |
| GPC.....                                                                                                              | 21 |
| XIII. P23BT using Ti(OBu) <sub>4</sub> & Meso-2,3-BDO, 2 measurements.....                                            | 21 |
| XIV. P23BT using Ti(OBu) <sub>4</sub> & R,R-2,3-BDO, 2 measurements .....                                             | 22 |
| XV. P23BT using Zr(OBu) <sub>4</sub> & Meso-2,3-BDO .....                                                             | 23 |
| XVI. P23BT using Zr(OBu) <sub>4</sub> & R,R-2,3-BDO.....                                                              | 24 |
| XVII. P23BT using La(acac) <sub>3</sub> .....                                                                         | 24 |
| XVIII. P23BT using Zn(OAc) <sub>2</sub> .H <sub>2</sub> O.....                                                        | 25 |
| DSC.....                                                                                                              | 25 |
| XIX. DSC curves P23BT polyesters synthesized using either Zr(OBu) <sub>4</sub> or Ti(OBu) <sub>4</sub> .....          | 25 |
| XX. Annealing “P23BT synthesized using Ti(OBu) <sub>4</sub> & R,R-2,3-BDO” .....                                      | 26 |
| XXI. Annealing “P23BT synthesized using Ti(OBu) <sub>4</sub> & meso-2,3-BDO” .....                                    | 27 |
| TGA (original curve in paper) .....                                                                                   | 28 |

# NMR spectra and calculations

## I. Interpretation of NMR for transesterification of DMT with 2,3-BDO to P23BT (example)

For the polymerization experiments (P23BT synthesis), the progress of the transesterification reaction was monitored over time, and the final polyester was confirmed by <sup>1</sup>H-NMR analysis. Below, we provide an example of a representative spectrum recorded during the transesterification step, along with its interpretation. This interpretation is universally applicable to all P23BT syntheses and, together with the detailed calculation procedure described thereafter, forms the basis for the data presented in the main text (Figures 4 and 5).

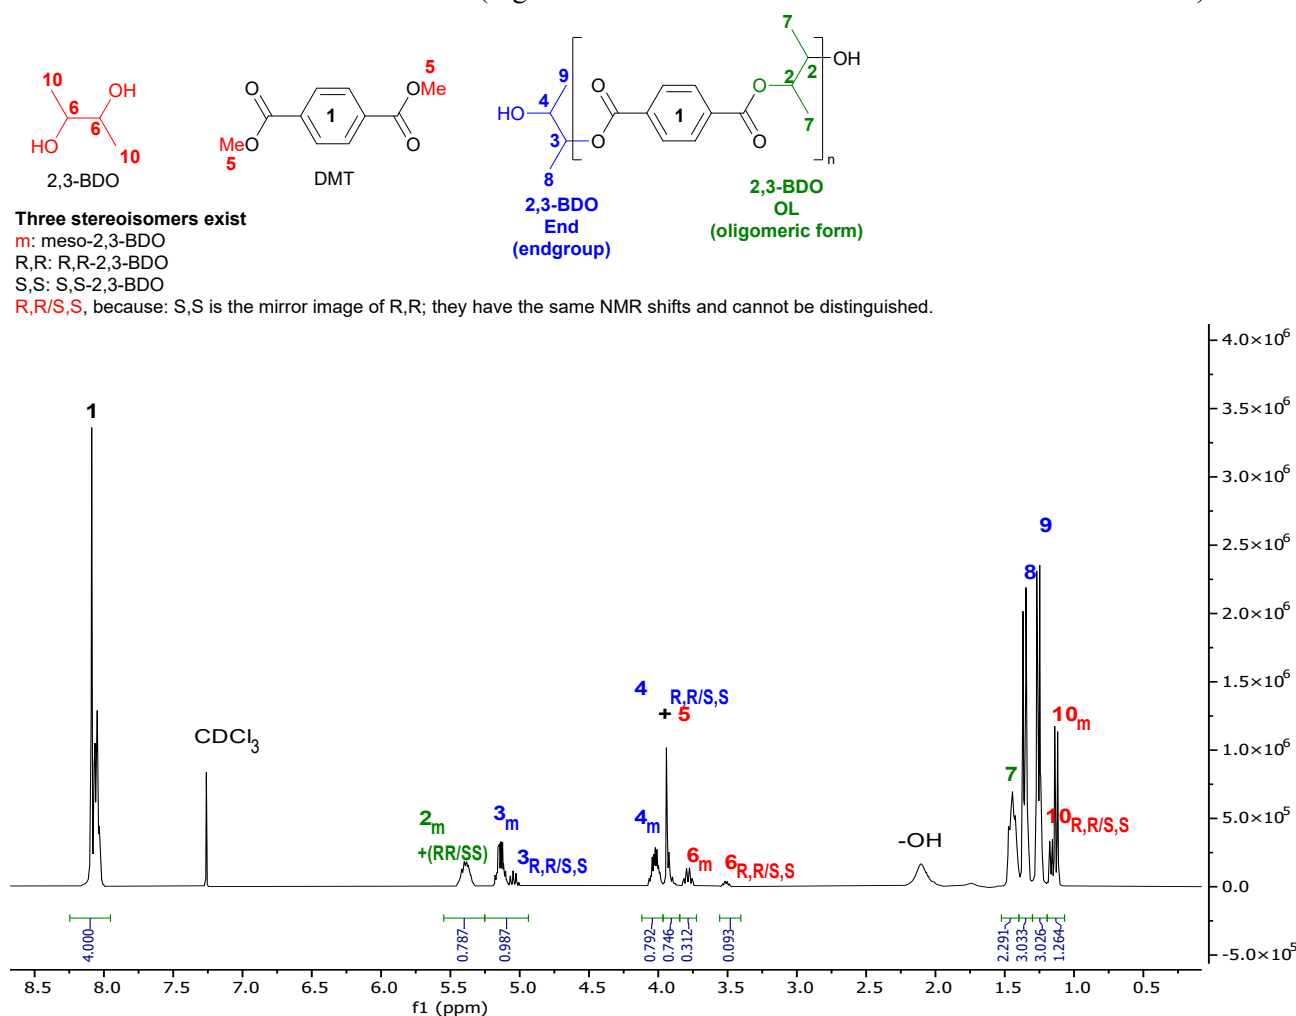

Before calculation, normalize integral at ~8.1 ppm to 4.000

### Calculation:

1. % 2,3-BDO ester = ("OL CH: signal 2" + "End1Meso+R,R/S,S CH: signal 3<sub>m</sub> + 3<sub>R,R/S,S</sub>")/2\*100%
2. "Total 2,3-BDO free and bound"= ("OL CH: signal 2" + "End1Meso+R,R/S,S CH: signal 3<sub>m</sub> + 3<sub>R,R/S,S</sub>"x2 + "Free1=6<sub>m</sub>" + "Free2: 6<sub>R,R/S,S</sub>")/2
3. Methyl ester signal (CH<sub>3</sub> & two per DMT) = "Integral 5 + 4 (due to overlap)" - "3"

Explanation:

- Normalized on protons of terephthalate “T” (4H), so 4 = 1 equivalent of terephthalate.
- Both “OL CH: signal 2” + “End1 meso+R,R/S,S CH: signal 3<sub>m</sub> + 3<sub>R,R/S,S</sub>” belong to -CH- (1H) next to a 2,3-BDO ester group
- Divided by 2, since each terephthalate has two ester groups
- Both 4 and 3 should have same integral, belonging to the two different CH groups of an 2,3-BDO endgroup

## II. 2,3-BDO 78% used for La & Zn polymerization experiments

In the experimental section, we report using “2,3-BDO (98%, Sigma-Aldrich, meso:R,R ratio of 78:22 based on <sup>1</sup>H-NMR spectrum)” for the synthesis of P23BT with either La or Zn as catalyst. Below, we provide the <sup>1</sup>H-NMR spectrum and the corresponding interpretation used to determine the meso:R,R ratio of 78:22.

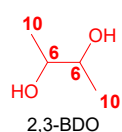

### Three stereoisomers exist

m: meso-2,3-BDO

R,R: R,R-2,3-BDO

S,S: S,S-2,3-BDO

R,R/S,S, because: S,S is the mirror image of R,R; they have the same NMR shifts and cannot be distinguished.

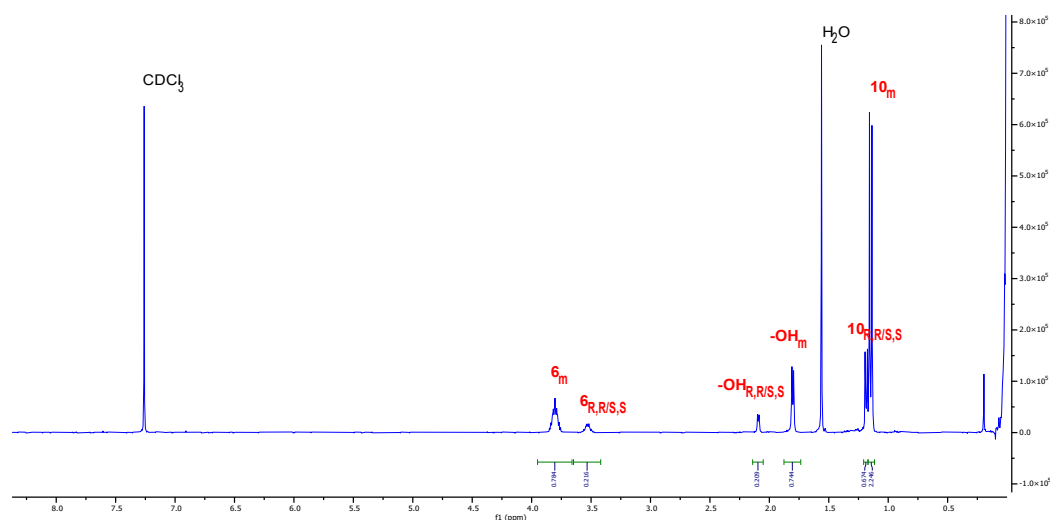

### III. DMT, 2,3-BDO & La(acac)<sub>3</sub> catalyst for P23BT synthesis: <sup>1</sup>H NMR over time

In the first section of the supplementary information we discussed the interpretation of an exemplary spectrum for the synthesis of P23BT. In addition, the relevant calculations are also shared in this first section. Now in this section, we firstly share all the complete spectra used to generate the red diamond datapoints in figure 4 in the main text, “Transesterification over time for DMT and commercial 2,3-BDO catalysed by 0.3 mol% La(acac)<sub>3</sub>”. However, since most relevant changes are clearly visible ~5.8-3.4 ppm, a zoomed in version of the spectra below is showed immediately hereafter. The spectra are named #1-#11 (and in the later discussed table fig #1-11) and represent a time point, thus #1 is taken at 0.5h and #2 at 1.5 h etc. Of course the spectra are integrated and this data is summarized in a table directly after the zoomed in spectrum (area5.8-3.4ppm). These integrations are used to calculate (using calculations and abbreviations as discussed in the first section) for the transesterification over time.

#### DMT, commercial mix of 2,3-BDO & La(acac)<sub>3</sub> catalyst for P23BT synthesis: Proton NMR over time: Full spectra

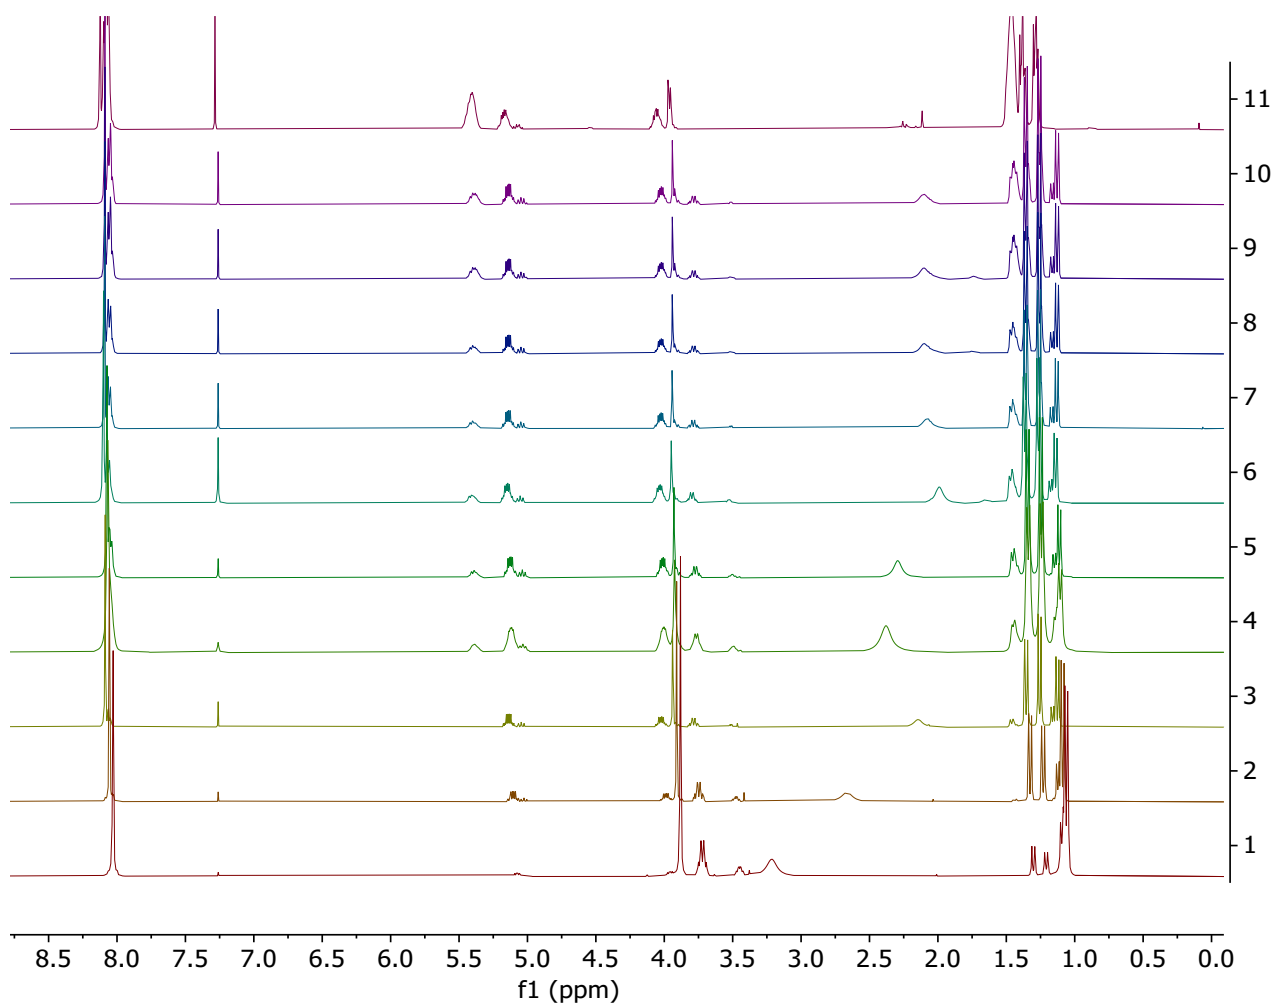

**DMT, commercial mix of 2,3-BDO & La(acac)<sub>3</sub> catalyst for P23BT synthesis: Proton NMR over time: area 5.8-3.4 ppm**

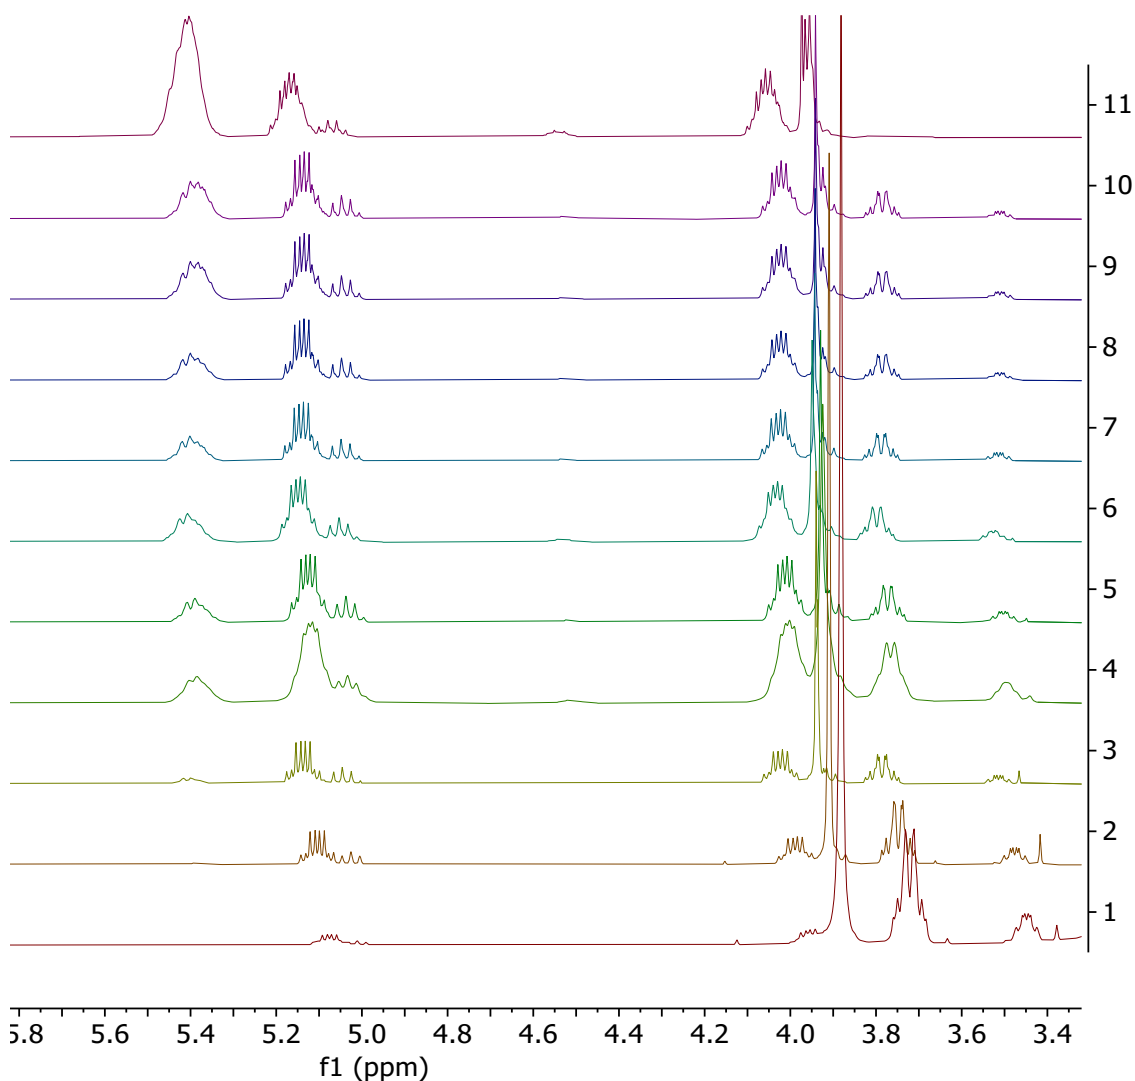

| Time (h)<br>/integral | T | Ol CH | End1meso+RR<br>CH | End2meso+RR<br>CH+ MeR | Free1 | Free2 | Fig.# |
|-----------------------|---|-------|-------------------|------------------------|-------|-------|-------|
| 0.5                   | 4 | 0.004 | 0.305             | 5.382                  | 2.395 | 0.755 | 1     |
| 1.5                   | 4 | 0.057 | 0.865             | 4.018                  | 1.376 | 0.393 | 2     |
| 3                     | 4 | 0.226 | 1.209             | 2.832                  | 0.704 | 0.252 | 3     |
| 4.5                   | 4 | 0.353 | 1.230             | 2.365                  | 0.674 | 0.239 | 4     |
| 6                     | 4 | 0.441 | 1.218             | 2.133                  | 0.477 | 0.165 | 5     |
| 7.5                   | 4 | 0.520 | 1.166             | 0.954+0.969            | 0.456 | 0.156 | 6     |
| 9.5                   | 4 | 0.608 | 1.148             | 1.772                  | 0.411 | 0.140 | 7     |
| 11.5                  | 4 | 0.654 | 1.145             | 1.755                  | 0.408 | 0.138 | 8     |
| 27                    | 4 | 0.782 | 0.990             | 1.538                  | 0.327 | 0.100 | 9     |
| 27.5                  | 4 | 0.787 | 0.987             | 0.792+0.746            | 0.312 | 0.093 | 10    |
| End PC                | 4 | 1.214 | 0.573             | 0.988                  |       |       | 11    |

#### IV. DMT, 2,3-BDO & Zn(OAc)<sub>2</sub>•2H<sub>2</sub>O catalyst for P23BT synthesis: <sup>1</sup>H NMR over time

In the first section of the supplementary information we discussed the interpretation of an exemplary spectrum for the synthesis of P23BT. In addition, the relevant calculations are also shared in this first section. Now in this section, we firstly share all the complete spectra used to generate the purple diamond (◇) datapoints in figure 4 in the main text, “Transesterification over time for DMT and commercial 2,3-BDO catalysed by 0.3 mol% Zn(OAc)<sub>2</sub>”. However, since most relevant changes are clearly visible ~5.8-3.4 ppm, a zoomed in version of the spectra below is showed immediately hereafter. The spectra are named #1-#18 (and in the later discussed table fig #1-#18) and represent a time point, thus #1 is taken at 0.5h and #2 at 1.0 h etc. Of course the spectra are integrated and this data is summarized in a table directly after the zoomed in spectrum (area5.8-3.4ppm). These integrations are used to calculate (using calculations as discussed in the first section) for the transesterification over time.

#### DMT, commercial mix of 2,3-BDO & Zn(OAc)<sub>2</sub>•2H<sub>2</sub>O catalyst for P23BT synthesis, Proton NMR over time: full spectra

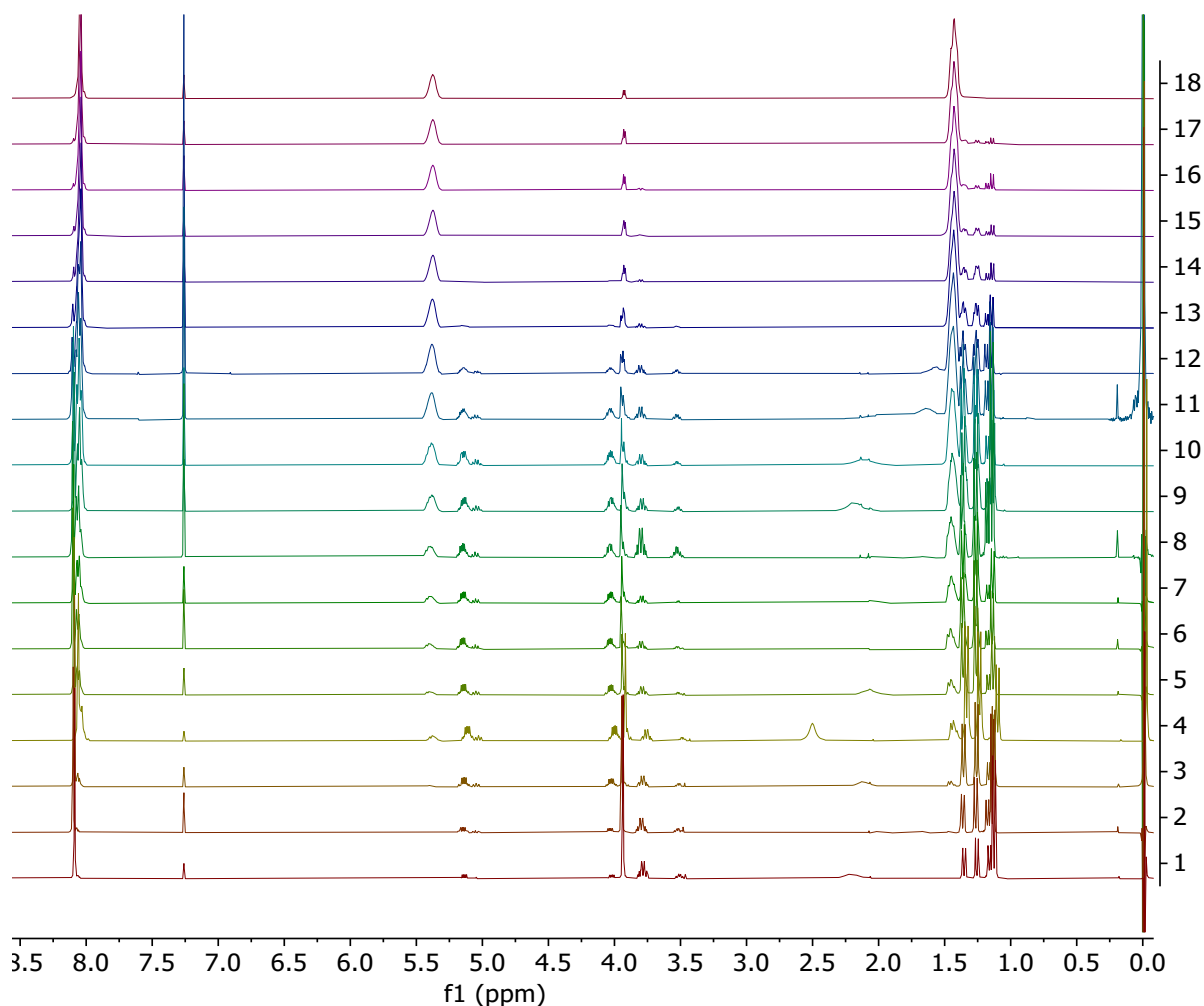

**DMT, commercial mix of 2,3-BDO & Zn(OAc)<sub>2</sub>·2H<sub>2</sub>O catalyst for P23BT synthesis: Proton NMR over time: area 5.8-3.2 ppm**

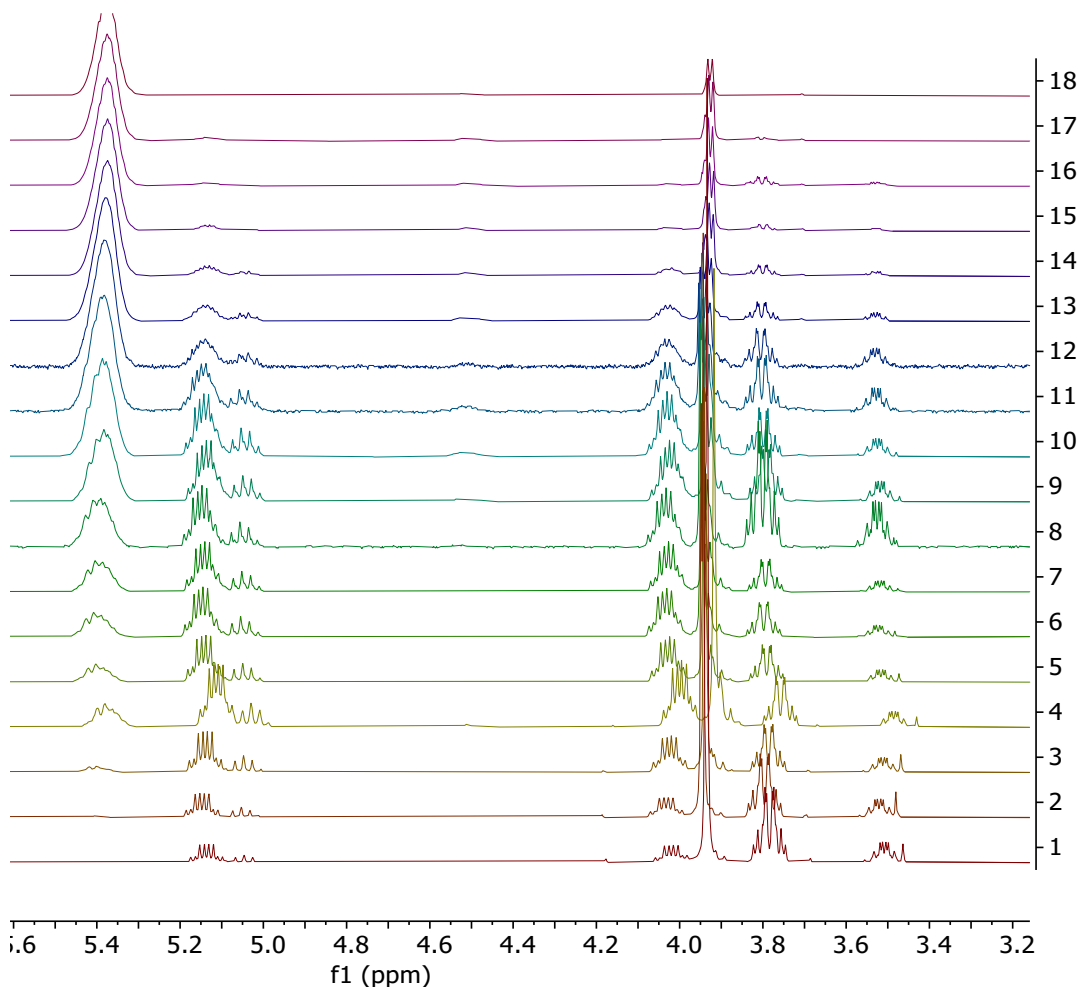

| Time(h)/integral | T | Ol CH | End1meso+RR<br>CH | End2meso+RR<br>CH+ MeR | Free1 | Free2 | Fig.# |
|------------------|---|-------|-------------------|------------------------|-------|-------|-------|
| 0.5              | 4 | 0.015 | 0.55              | 4.76                   | 1.863 | 0.598 | 1     |
| 1                | 4 | 0.034 | 0.772             | 4.095                  | 1.545 | 0.573 | 2     |
| 2                | 4 | 0.192 | 1.055             | 3.111                  | 0.94  | 0.305 | 3     |
| 4                | 4 | 0.444 | 1.094             | 2.316                  | 0.584 | 0.192 | 4     |
| 4.5              | 4 | 0.498 | 1.066             | 2.139                  | 0.565 | 0.219 | 5     |
| 6                | 4 | 0.609 | 1.026             | 1.897                  | 0.458 | 0.16  | 6     |
| 7.5              | 4 | 0.746 | 0.947             | 1.641                  | 0.374 | 0.135 | 7     |
| 9                | 4 | 0.872 | 0.809             | 1.326                  | 0.987 | 0.397 | 8     |
| 11               | 4 | 1.017 | 0.737             | 1.247                  | 0.383 | 0.151 | 9     |
| 12.5             | 4 | 1.119 | 0.642             | 1.105                  | 0.263 | 0.11  | 10    |
| 14.5             | 4 | 1.295 | 0.547             | 0.938                  | 0.328 | 0.138 | 11    |
| 17.5             | 4 | 1.442 | 0.357             | 0.687                  | 0.22  | 0.109 | 12    |
| 19.5             | 4 | 1.535 | 0.248             | 0.583                  | 0.133 | 0.06  | 13    |
| 21.75            | 4 | 1.666 | 0.186             | 0.487                  | 0.097 | 0.043 | 14    |
| 24.75            | 4 | 1.728 | 0.117             | 0.42                   | 0.072 | 0.029 | 15    |
| 27               | 4 | 1.764 | 0.094             | 0.38                   | 0.096 | 0.04  | 16    |
| 27.5             | 4 | 1.775 | 0.09              | 0.372                  | 0.051 | 0.018 | 17    |
| End PC           | 4 | 1.866 | 0.035             | 0.188                  |       |       | 18    |

## V. DMT, Meso 2,3-BDO & Zr(OBu)<sub>4</sub> catalyst for P23BT synthesis: <sup>1</sup>H NMR Spectra of samples over time

Similar to the previous sections III and IV, the relevant <sup>1</sup>H-NMR spectra are shared, firstly the full spectra then one zoomed in for the relevant area, followed by integrations used to calculate the conversion. These are used for the datapoints in figure 5, left side blue diamonds (◇).

### DMT, Meso 2,3-BDO & Zr(OBu)<sub>4</sub> catalyst for P23BT synthesis, Proton NMR Spectra of samples over time: full spectra

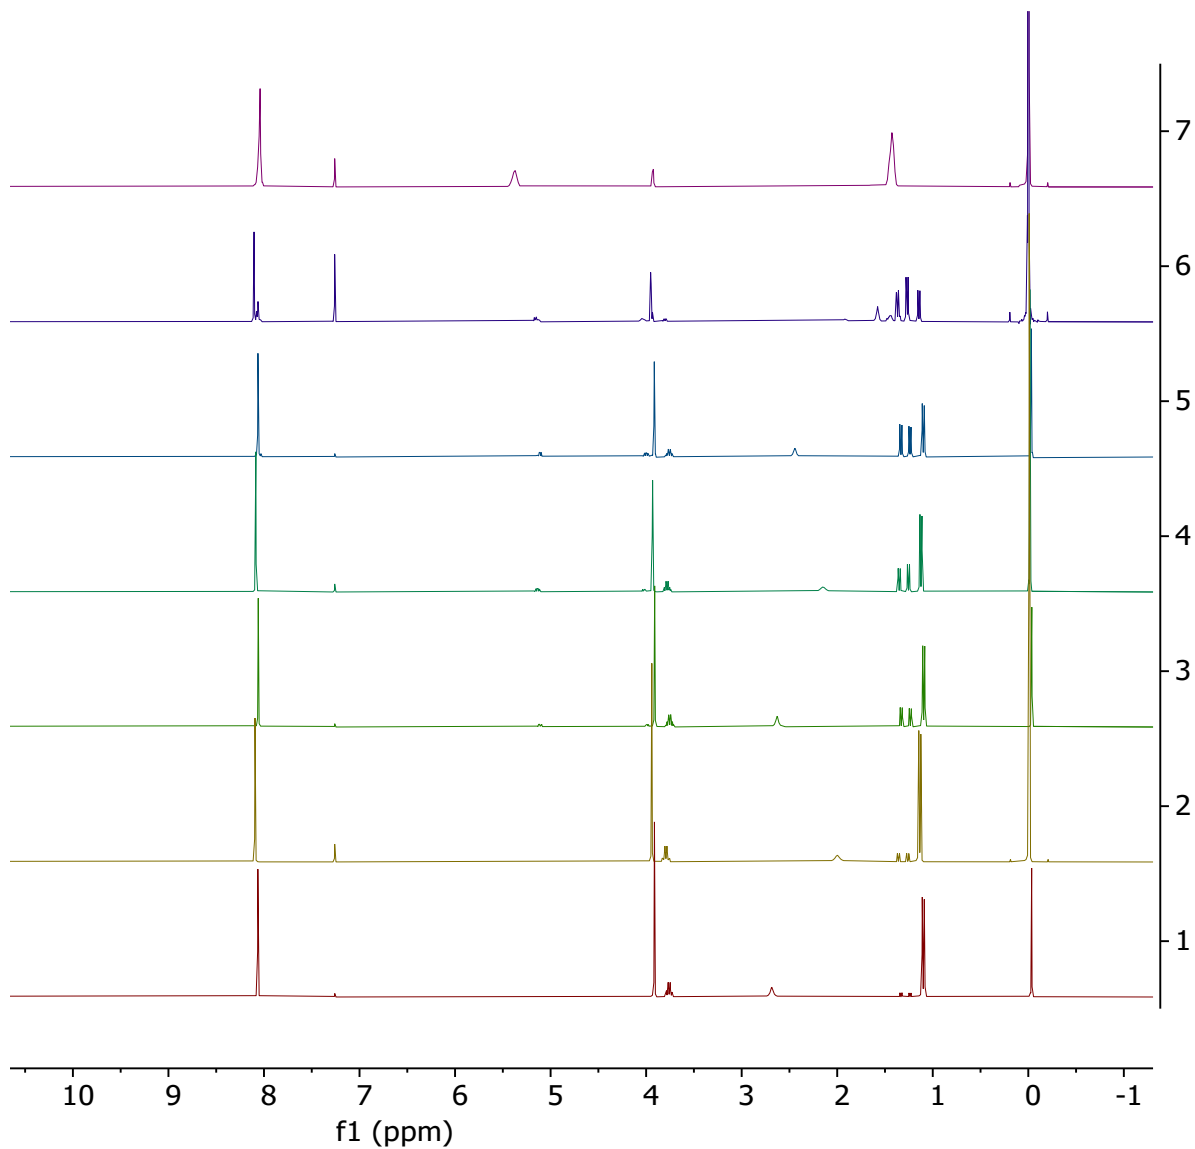

**DMT, Meso 2,3-BDO & Zr(OBu)<sub>4</sub> catalyst for P23BT synthesis: Proton NMR Spectra of samples over time (ZOOMED IN 6.1-3.35 ppm)**

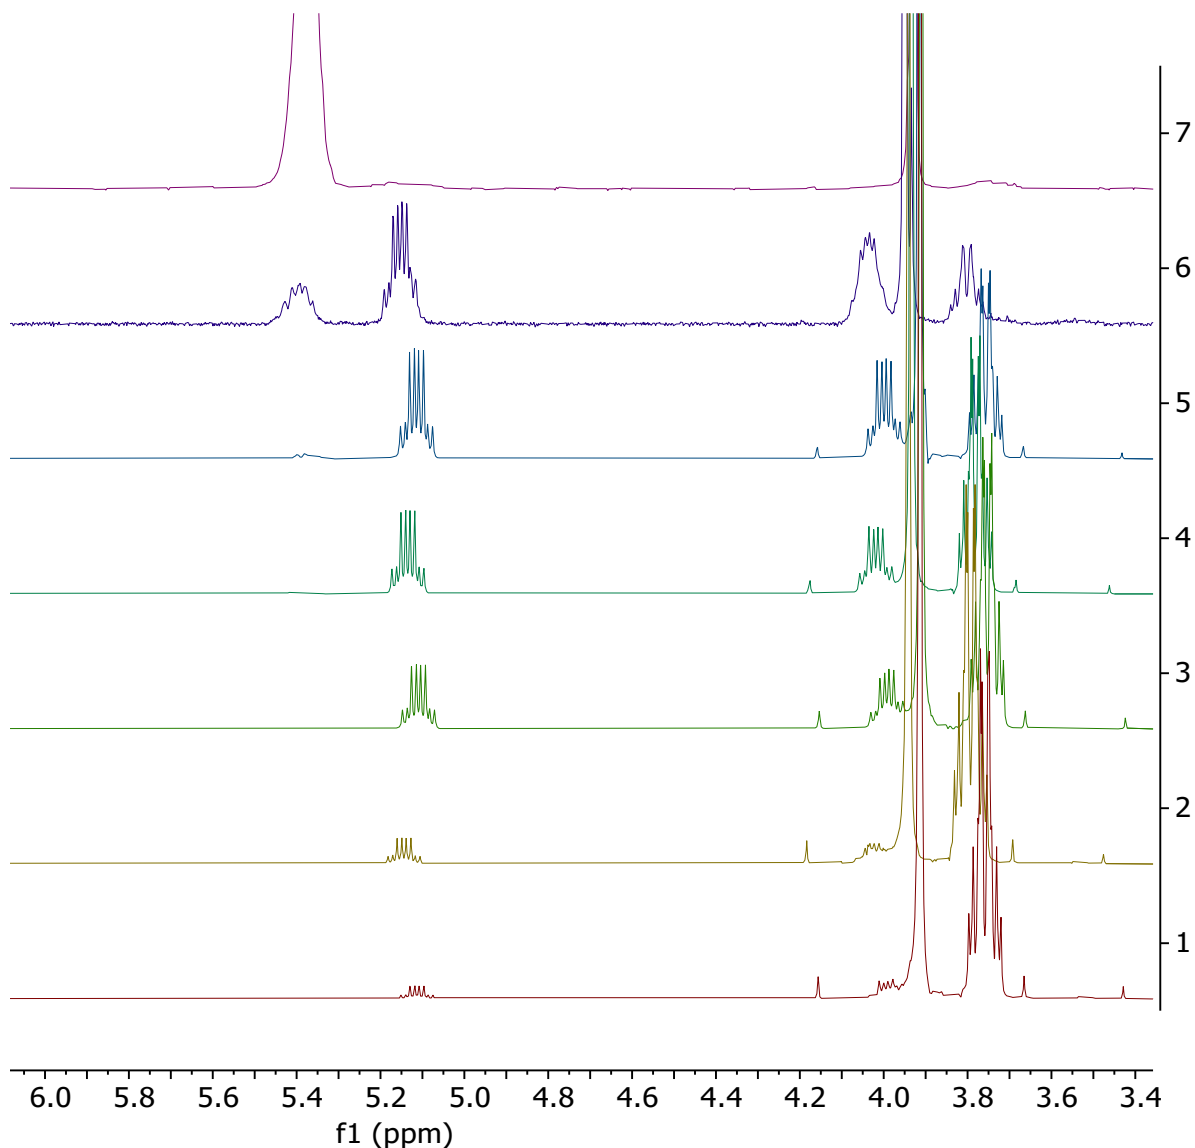

Table of integrals based on spectra above

| Time(h)/integral | T | Ol CH | End1 CH | End2 CH+ MeOR | Fig.# |
|------------------|---|-------|---------|---------------|-------|
| 0.5              | 4 | 0     | 0.097   | 5.830         | 1     |
| 1                | 4 | 0     | 0.173   | 5.736         | 2     |
| 3                | 4 | 0.013 | 0.431   | 5.122         | 3     |
| 5                | 4 | 0.035 | 0.608   | 4.711         | 4     |
| 7                | 4 | 0.061 | 0.738   | 4.345         | 5     |
| 23.5             | 4 | 0.445 | 0.893   | 2.818         | 6     |
| End PC           | 4 | 1.745 | 0.064   | 0.564         | 7     |

## VI. DMT, R,R-2,3-BDO & Zr(OBu)<sub>4</sub> catalyst for P23BT synthesis: <sup>1</sup>H NMR Spectra of samples over time

Similar to the previous sections III and IV, the relevant <sup>1</sup>H-NMR spectra are shared, firstly the full spectra then one zoomed in for the relevant area, followed by integrations used to calculate the conversion. These are used for the datapoints in figure 5, left side green diamonds (◇).

### DMT, R,R-2,3-BDO & Zr(OBu)<sub>4</sub> catalyst for P23BT synthesis, Proton NMR Spectra of samples over time: full spectra

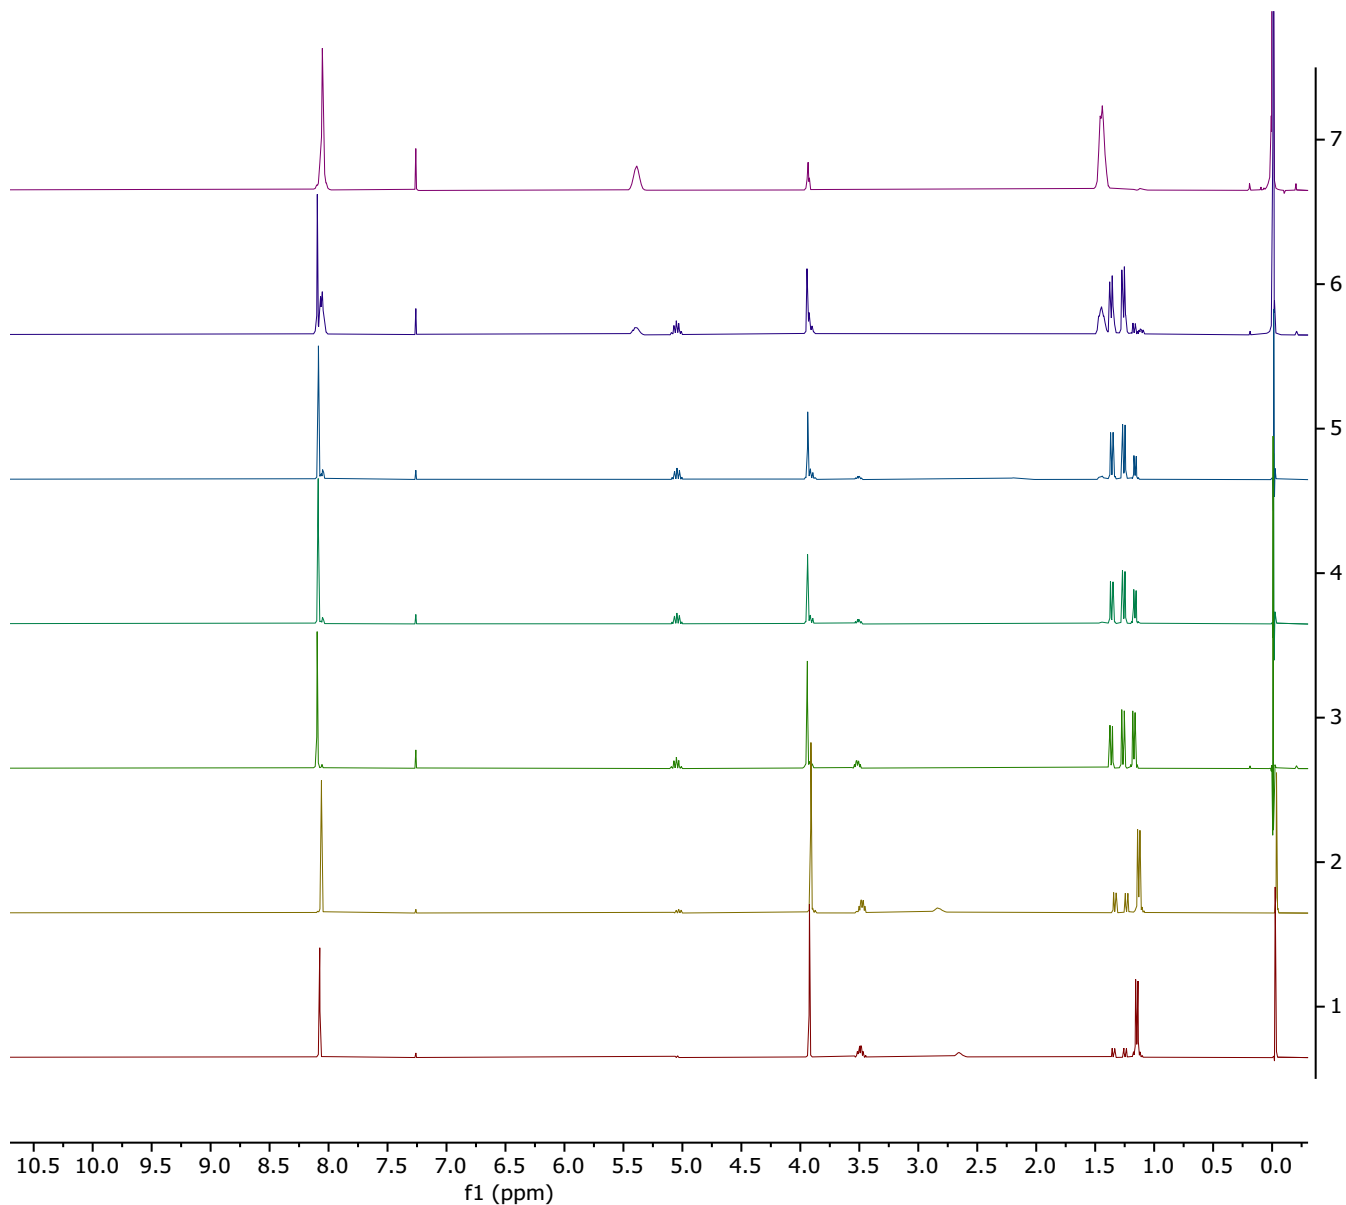

**DMT, R,R-2,3-BDO & Zr(OBu)<sub>4</sub> catalyst for P23BT synthesis: Proton NMR Spectra of samples over time (ZOOMED IN 5.85-3.05 ppm)**

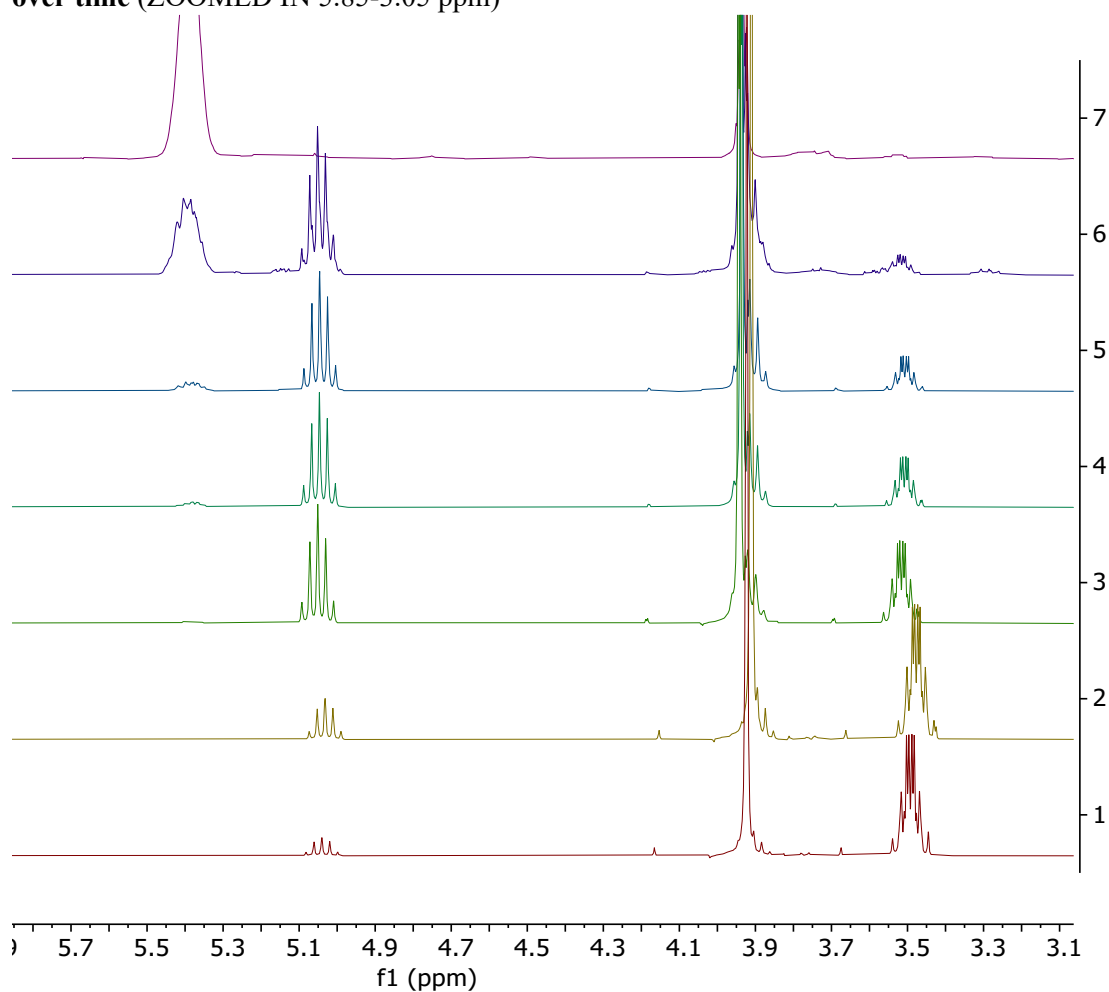

Table of integrals based on spectra above

| Time(h)/integral | T | Ol CH | End1 CH | End2 CH+ MeOR | Fig.# |
|------------------|---|-------|---------|---------------|-------|
| 0.5              | 4 | 0     | 0.232   | 5.526         | 1     |
| 1                | 4 | 0     | 0.399   | 5.199         | 2     |
| 3                | 4 | 0.043 | 0.859   | 4.048         | 3     |
| 5                | 4 | 0.131 | 1.029   | 3.481         | 4     |
| 7                | 4 | 0.221 | 1.049   | 3.192         | 5     |
| 23.5             | 4 | 0.820 | 0.691   | 1.913         | 6     |
| End PC           | 4 | 1.716 | 0.098   | 0.513         | 7     |

## VII. DMT, Meso 2,3-BDO & Ti(OBu)<sub>4</sub> catalyst for P23BT synthesis: <sup>1</sup>H NMR Spectra of samples over time

Similar to the previous sections III and IV, the relevant <sup>1</sup>H-NMR spectra are shared, firstly the full spectra then one zoomed in for the relevant area, followed by integrations used to calculate the conversion. These are used for the datapoint in figure 5, right side blue diamonds (◇).

### DMT, Meso 2,3-BDO & Ti(OBu)<sub>4</sub> catalyst for P23BT synthesis, Proton NMR Spectra of samples over time: full spectra

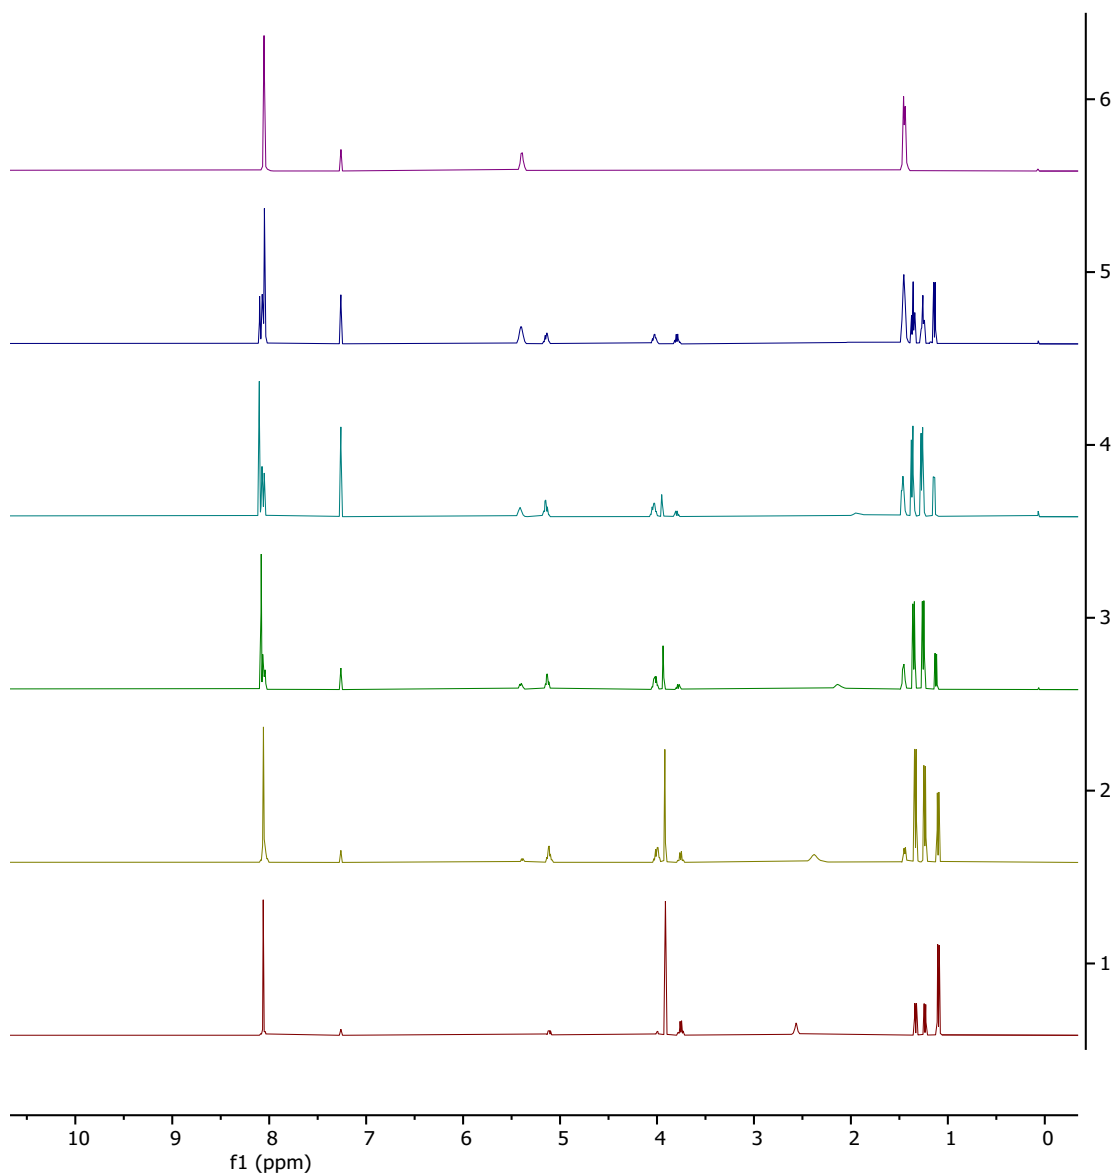

**DMT, Meso 2,3-BDO & Ti(OBu)<sub>4</sub> catalyst for P23BT synthesis: Proton NMR Spectra of samples over time (ZOOMED IN 5.85-3.3ppm)**

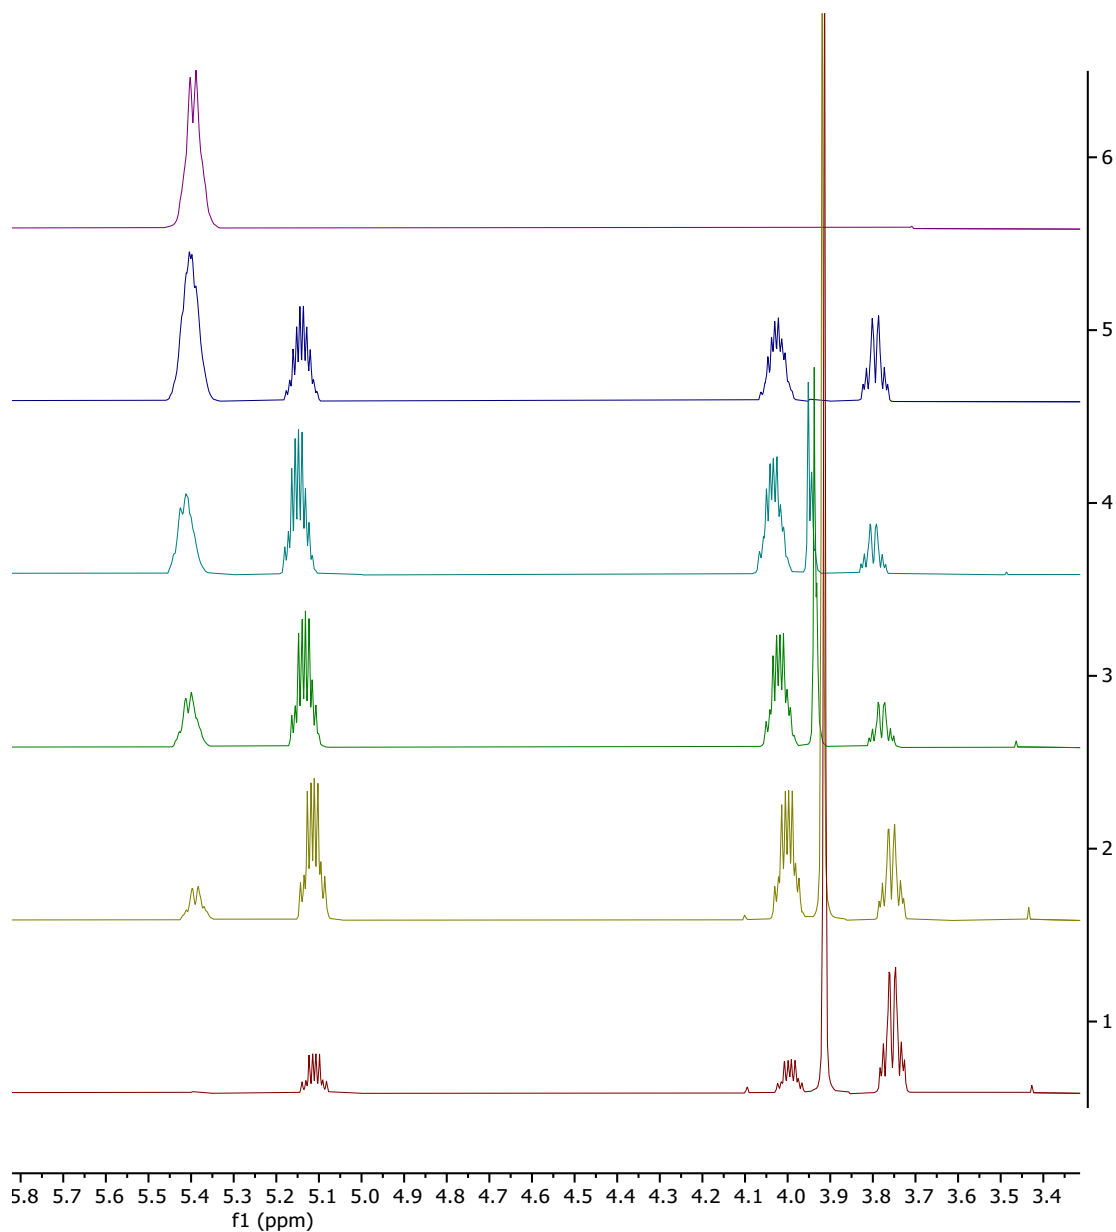

Table of integrals based on spectra above

| Time(h)/integral | T | Ol CH | End1 CH | End2 CH+ MeOR | Fig.# |
|------------------|---|-------|---------|---------------|-------|
| 1                | 4 | 0.036 | 0.595   | 4.749         | 1     |
| 3                | 4 | 0.302 | 1.105   | 2.889         | 2     |
| 5                | 4 | 0.602 | 1.112   | 1.968         | 3     |
| 7                | 4 | 0.813 | 1.024   | 1.031         | 4     |
| 23.5             | 4 | 1.376 | 0.607   | 0.607 /0.6    | 5     |
| End PC           | 4 | 1.971 | 0.013   | 0.007         | 6     |

## VIII. DMT, R,R-2,3-BDO & Ti(OBu)<sub>4</sub> catalyst for P23BT synthesis: <sup>1</sup>H NMR Spectra of samples over time

Similar to the previous sections III and IV, the relevant <sup>1</sup>H-NMR spectra are shared, firstly the full spectra then one zoomed in for the relevant area, followed by integrations used to calculate the conversion. These are used for the datapoint in figure 5, right side green diamonds (◇).

### DMT, R,R-2,3-BDO & Ti(OBu)<sub>4</sub> catalyst for P23BT synthesis, Proton NMR Spectra of samples over time: full spectra

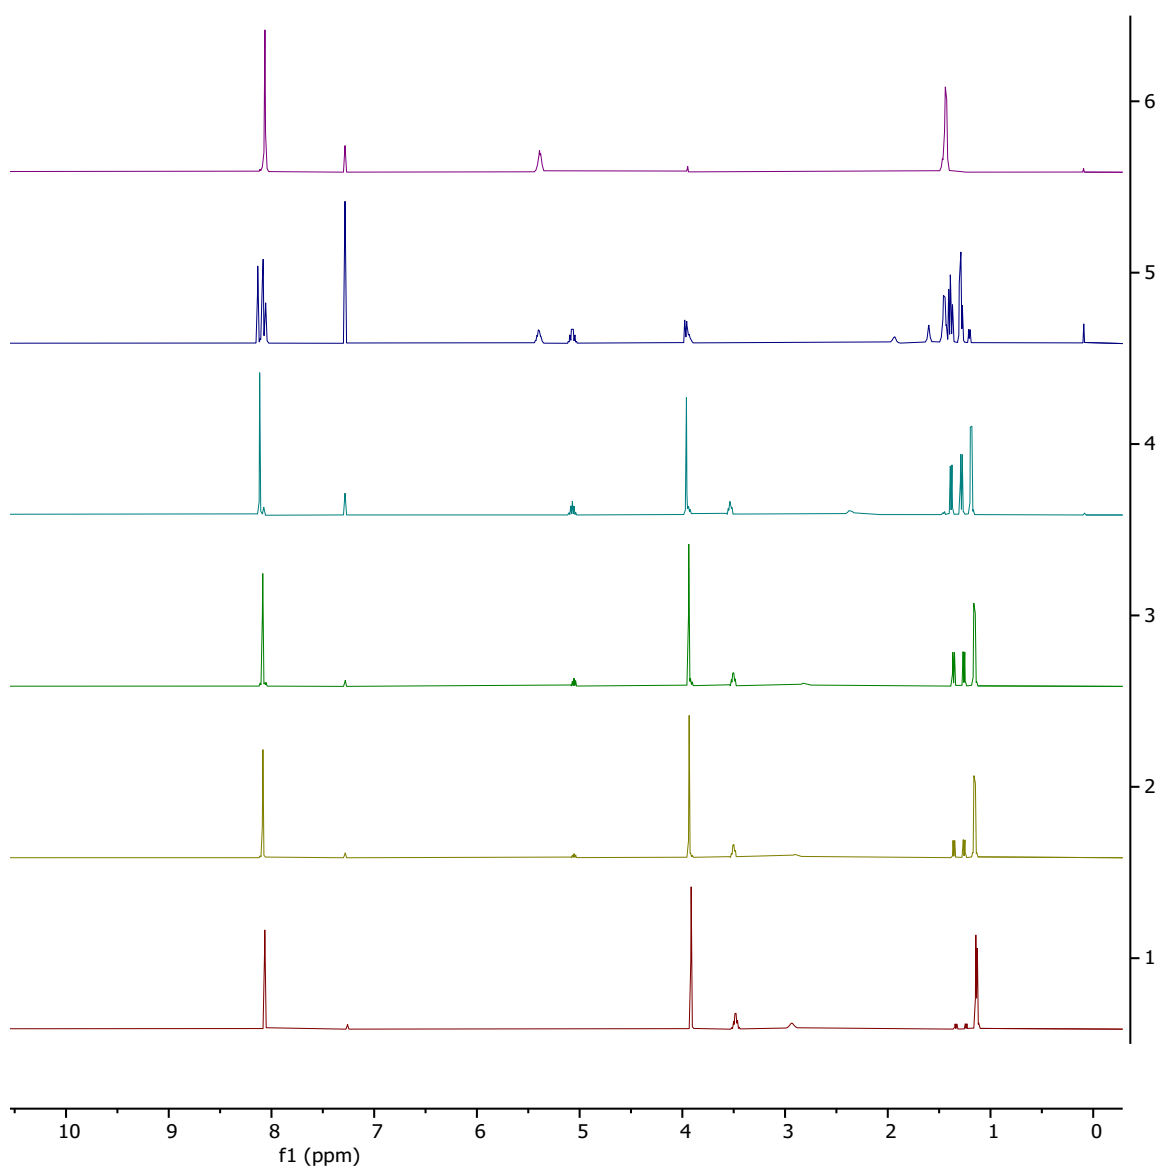

## DMT, R,R-2,3-BDO & Ti(OBu)<sub>4</sub> catalyst for P23BT synthesis: Proton NMR Spectra of samples over time (ZOOMED IN)

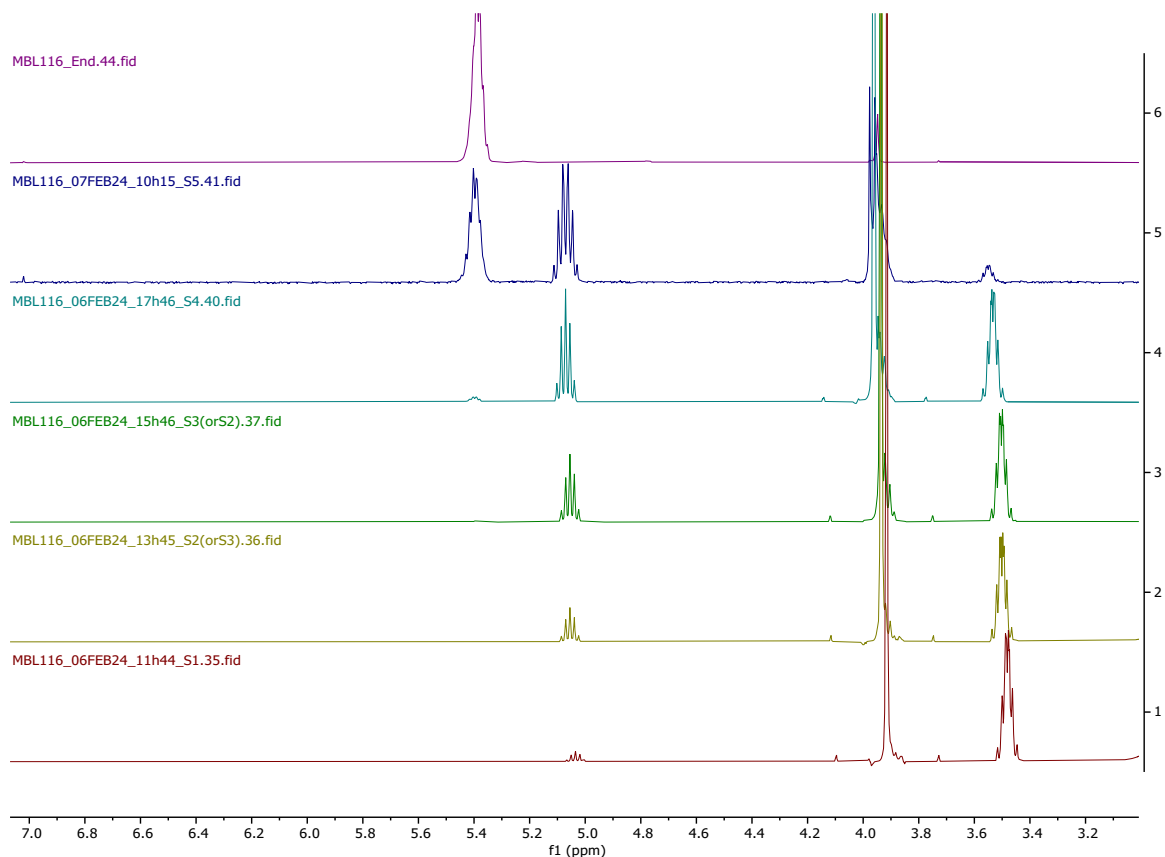

Table of integrals based on spectra above

| Time(h)/integral | T | O1 CH | End1 CH | End2 CH+ MeOR | Fig.# |
|------------------|---|-------|---------|---------------|-------|
| 1                | 4 | 0     | 0.147   | 5.774         | 1     |
| 3                | 4 | 0     | 0.386   | 5.252         | 2     |
| 5                | 4 | 0.036 | 0.627   | 4.688         | 3     |
| 7                | 4 | 0.082 | 0.831   | 4.144         | 4     |
| 23.5             | 4 | 1.005 | 0.828   | 1.335         | 5     |
| End PC           | 4 | 1.927 | 0.006   | 0.126         | 6     |

## IX. Converted integrals for data conversion graph

In sections V-VIII, the integrals are shared that form the basis of the points in figure 5. In the table below these integrals are converted into percentages, written as “% E<sub>2,3-BDO</sub>” which are shown in this figure using the previously discussed calculations. The colors are the same color as of the diamonds (◇) used in the figure.

| Time (h) | Zr Meso                |                           | Zr RR                  |                           | Ti Meso                |                           | Ti RR                  |                           |
|----------|------------------------|---------------------------|------------------------|---------------------------|------------------------|---------------------------|------------------------|---------------------------|
| (h)      | % E <sub>2,3-BDO</sub> | % E <sub>2,3-BDO_ol</sub> |
| 0.5      | 4.9                    | 0                         | 11.6                   | 0                         | -                      | -                         | -                      | -                         |
| 1        | 8.7                    | 0                         | 20.0                   | 0                         | 31.55                  | 1.8                       | 7.35                   | 0.0                       |
| 3        | 22.2                   | 0.7                       | 45.1                   | 2.2                       | 70.35                  | 15.1                      | 19.3                   | 0.0                       |
| 5        | 32.2                   | 1.8                       | 58.0                   | 6.6                       | 85.7                   | 30.1                      | 33.15                  | 1.8                       |

|      |      |      |      |      |       |       |       |      |
|------|------|------|------|------|-------|-------|-------|------|
| 7    | 40.0 | 3.1  | 63.5 | 11.1 | 91.85 | 40.65 | 45.65 | 4.1  |
| 23.5 | 66.9 | 22.3 | 75.6 | 41.0 | 99.15 | 68.8  | 91.65 | 50.3 |

## X. Side products

In the main text side products in P23BT polyester synthesis is discussed, below the relevant spectra that shows side products besides the main polyester peak. This is for the synthesis of P23BT using meso-2,3-BDO and titanium catalyst besides DMT. The allyl dehydration product of 2,3-BDO is shown as an end group and interpreted in the NMR above. Other peaks remain unknown, some could be ethers of 2,3-BDO or other side products.

**Ti Meso** final polymer zoomed in to show side products in NMR

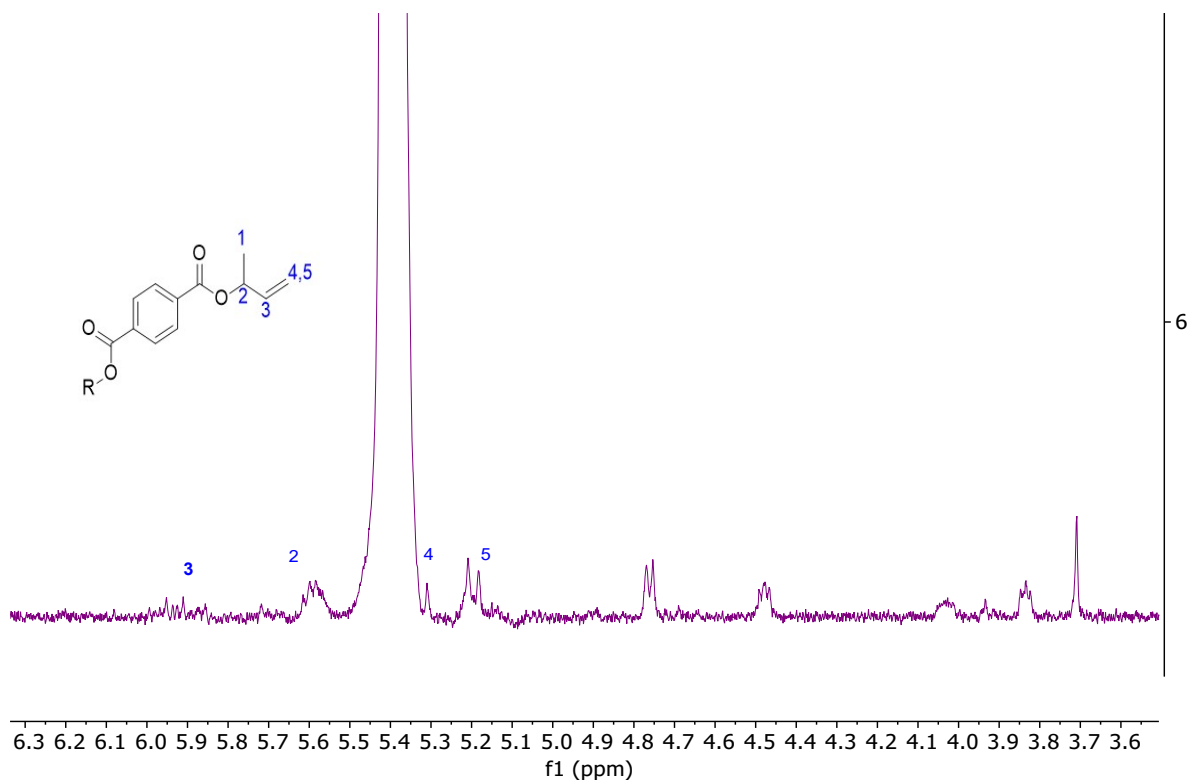

## XI. Interpretation spectra of catalyst study using phenylbenzoate and meso- or *R,R*-2,3-BDO.

Below results of phenylbenzoate transesterification using  $\text{La}(\text{acac})_3$  catalyst with either *R,R*- (top) or Meso-2,3-BDO (below). Interpretation shown: start materials in red & main products in blue. Since this was one of the most active catalyst, thus (exceptionally) also another transesterification product was visible in the spectra in a very small quantities: the diester of 2,3-BDO, indicated in green.

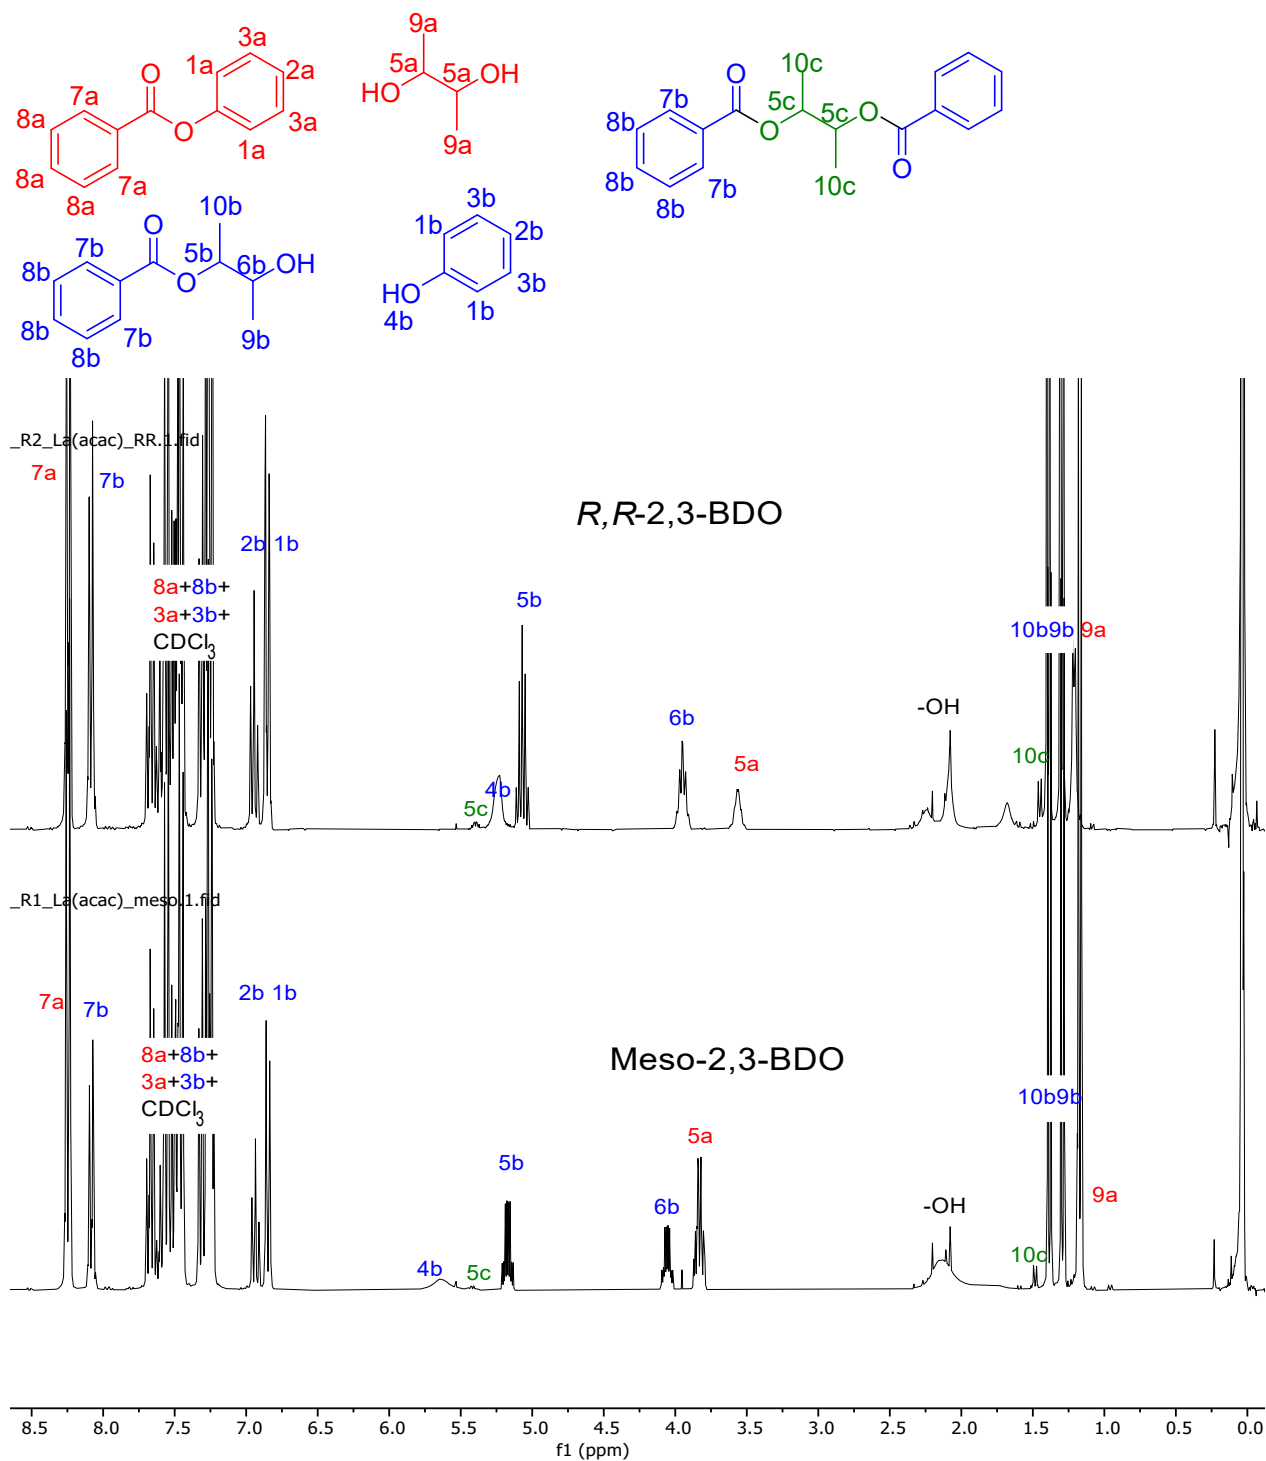

## XII. Spectra of catalyst study using phenylbenzoate and meso or R,R-2,3-BDO, various catalysts

First set of spectra is the full range (stacked horizontal) and the second set of spectra is zoomed in on the aromatic part (~8.5-8.0 ppm) used to quantify the conversion of the benzoate ester. This aromatic area of the spectra is stacked vertically (so peaks of benzoate of each film reactor experiment is next to each other by experiment number). The spectrum/experiment number is related to an experiment specified in the table below the set of spectra. The “\*” stands for an experiment of which the mixture was preheated before catalyst addition.

### set of spectra for model reaction (phenylbenzoate TE): the full range (stacked horizontal)

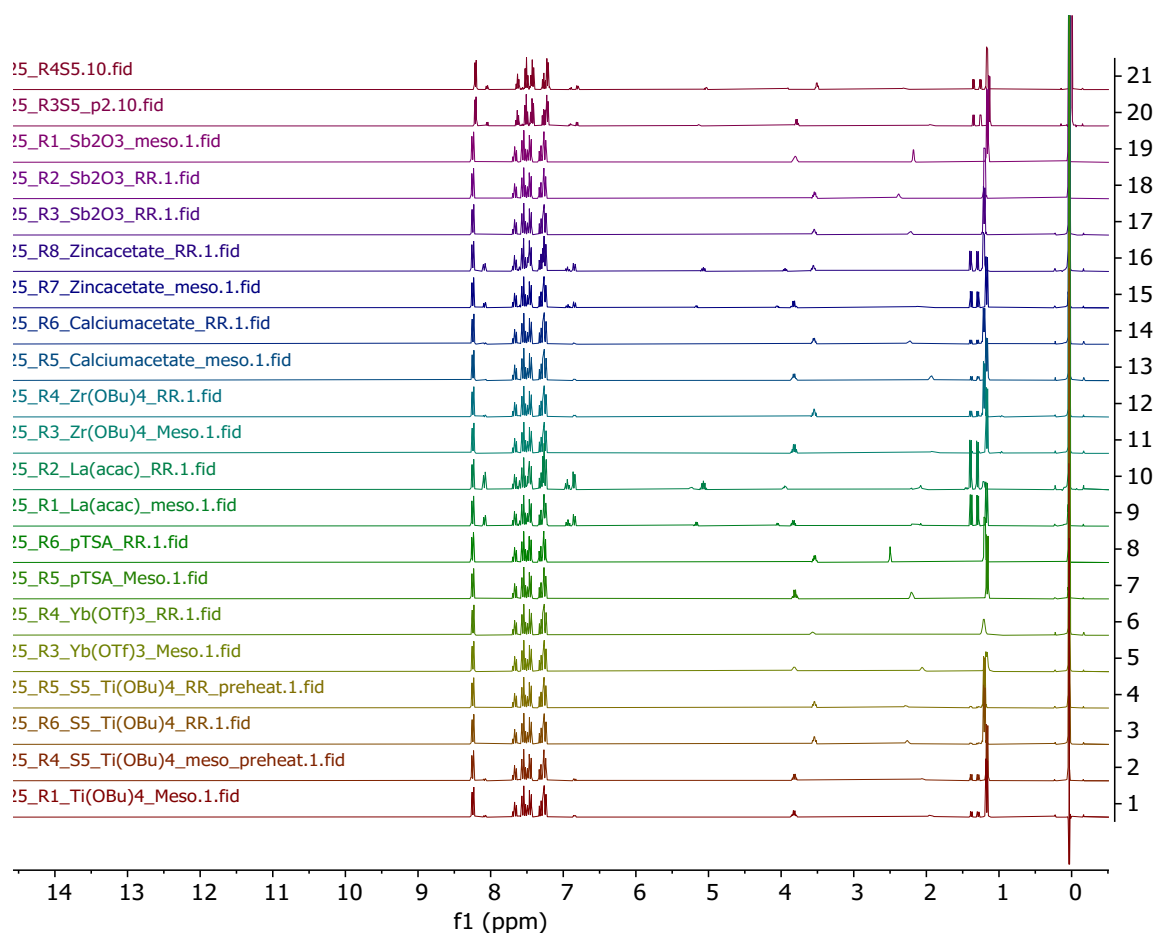

## Set of spectra for model reaction (phenylbenzoate TE): area ~8.5-8.0ppm (stacked vertically)

#1 stands for the most left spectrum, which is a zoomed in version of the same “spectra #1” in the previous figure (Ti(OBu)<sub>4</sub>\_meso in maroon color), this continues in a similar fashion and is also the same order as used to describe the results in the table below.

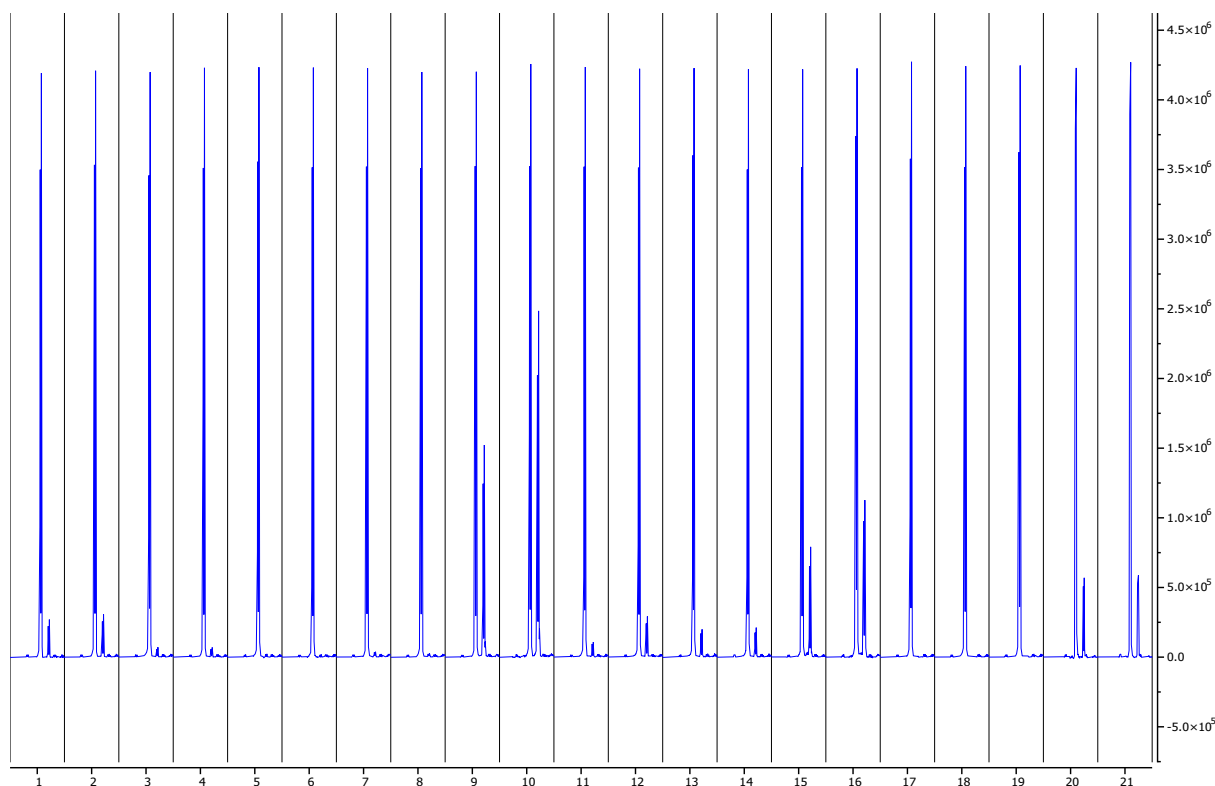

| #     | 1     | 2*    | 3     | 4*    | 5     | 6     | 7     | 8     | 9     | 10    | 11    | 12    | 13    | 14    | 15    | 16    | 17    | 18    | 19    | 20    | 21    |
|-------|-------|-------|-------|-------|-------|-------|-------|-------|-------|-------|-------|-------|-------|-------|-------|-------|-------|-------|-------|-------|-------|
| Cat   | Ti    | Ti    | Ti    | Ti    | Yb    | Yb    | TSA   | TSA   | La    | La    | Zr    | Zr    | Ca    | Ca    | Zn    | Zn    | Sb2O3 | Sb2O3 | Sb2O3 | Tin   | Tin   |
| 2,3   | M     | M     | RR    | RR    | M     | RR    | RR    | RR    | M     | M     | RR    |
| Min.  | 58    | 55    | 55    | 55    | 58    | 58    | 58    | 58    | 55    | 55    | 55    | 55    | 55    | 55    | 55    | 55    | 55    | 55    | 55    | 55    | 55    |
| Int.1 | 0.941 | 0.931 | 0.983 | 0.983 | 0.994 | 0.995 | 0.986 | 0.989 | 0.725 | 0.615 | 0.973 | 0.934 | 0.952 | 0.949 | 0.838 | 0.786 | 0.998 | 0.997 | 0.997 | 0.881 | 0.878 |
| Int.2 | 0.059 | 0.069 | 0.017 | 0.017 | 0.006 | 0.005 | 0.014 | 0.011 | 0.275 | 0.385 | 0.027 | 0.066 | 0.048 | 0.051 | 0.162 | 0.214 | 0.002 | 0.003 | 0.003 | 0.119 | 0.122 |

Table with experimental information, specific catalyst, isomer used (M=meso-, RR=R,R-2,3-BDO) and reaction time. In addition the integration of the benzoate peaks belonging to spectra above are shown which are used to calculate yields (“Int.1” stands for the starting material, Phenyl Benzoate, numbers need to be multiplied by 100 for percentages used for graph in main text of paper).

## Experimental: exact weight of starting materials in vials

| NMR spectra number | Catalyst               |                         |                |        |       | PhOBz   |        |          | 2,3-BDO      |        |       |          | Cat. loading % | Ratio 2,3-BDO |
|--------------------|------------------------|-------------------------|----------------|--------|-------|---------|--------|----------|--------------|--------|-------|----------|----------------|---------------|
|                    | Catalyst               | mg of catalyst solution | mg of catalyst | mw     | mmol  | mg      | mw     | mmol     | stereoisomer | mg     | mw    | mmol     |                |               |
| 20                 | BTHOH                  |                         | 3.32           | 208.83 | 0.016 | 1189.31 | 198.22 | 5.99995  | Meso         | 270.27 | 90.12 | 2.999001 | 0.26           | 2.00          |
| 21                 | BTHOH                  |                         | 3.35           | 208.83 | 0.016 | 1192.72 | 198.22 | 6.017153 | R,R          | 268.57 | 90.12 | 2.980138 | 0.27           | 2.02          |
| 19                 | Sb2O3                  |                         | 4.92           | 291.52 | 0.017 | 1187.03 | 198.22 | 5.988447 | Meso         | 267.92 | 90.12 | 2.972925 | 0.28           | 2.01          |
| 18                 | Sb2O3                  |                         | 5.34           | 291.52 | 0.018 | 1190.81 | 198.22 | 6.007517 | R,R          | 278.90 | 90.12 | 3.094763 | 0.30           | 1.94          |
| 17                 | Sb2O3                  |                         | 5.04           | 291.52 | 0.017 | 1192.11 | 198.22 | 6.014075 | R,R          | 270.03 | 90.12 | 2.996338 | 0.29           | 2.01          |
| 2                  | Ti(OBu) <sub>4</sub> * |                         | 6.9            | 340.32 | 0.020 | 1188.37 | 198.22 | 5.995207 | Meso         | 273.83 | 90.12 | 3.038504 | 0.34           | 1.97          |

|    |                                   |      |        |         |       |         |        |          |      |        |       |          |      |      |
|----|-----------------------------------|------|--------|---------|-------|---------|--------|----------|------|--------|-------|----------|------|------|
| 4  | Ti(OBu) <sub>4</sub> *            |      | 6.9    | 340.32  | 0.020 | 1187.94 | 198.22 | 5.993038 | R,R  | 266.41 | 90.12 | 2.95617  | 0.34 | 2.03 |
| 3  | Ti(OBu) <sub>4</sub>              |      | 6.89   | 340.32  | 0.020 | 1189.38 | 198.22 | 6.000303 | R,R  | 270.04 | 90.12 | 2.996449 | 0.34 | 2.00 |
| 1  | Ti(OBu) <sub>4</sub>              |      | 6.87   | 340.32  | 0.020 | 1188.73 | 198.22 | 5.997024 | Meso | 274.39 | 90.12 | 3.044718 | 0.34 | 1.97 |
| 5  | Yb(Ot <sub>f</sub> ) <sub>3</sub> |      | 11.18  | 620.25  | 0.018 | 1190.45 | 198.22 | 6.005701 | Meso | 270.36 | 90.12 | 3        | 0.30 | 2.00 |
| 6  | Yb(Ot <sub>f</sub> ) <sub>3</sub> |      | 11.36  | 620.25  | 0.018 | 1187.33 | 198.22 | 5.989961 | R,R  | 271.74 | 90.12 | 3.015313 | 0.31 | 1.99 |
| 7  | p-TSA                             |      | 3.10   | 190.213 | 0.016 | 1188.45 | 198.22 | 5.995611 | Meso | 269.61 | 90.12 | 2.991678 | 0.27 | 2.00 |
| 8  | p-TSA                             |      | 2.90   | 190.213 | 0.015 | 1191.02 | 198.22 | 6.008576 | R,R  | 272.7  | 90.12 | 3.025965 | 0.25 | 1.99 |
| 9  | La(acac) <sub>3</sub>             |      | 7.61   | 440.952 | 0.017 | 1189.87 | 198.22 | 6.002775 | Meso | 271.07 | 90.12 | 3.007878 | 0.29 | 2.00 |
| 10 | La(acac) <sub>3</sub>             |      | 7.79   | 440.952 | 0.018 | 1192.29 | 198.22 | 6.014983 | R,R  | 264.79 | 90.12 | 2.938194 | 0.29 | 2.05 |
| 12 | Zr(OBu) <sub>4</sub>              | 9.53 | (7.62) | 383.68  | 0.020 | 1187.88 | 198.22 | 5.992735 | Meso | 270.37 | 90.12 | 3.000111 | 0.33 | 2.00 |
| 11 | Zr(OBu) <sub>4</sub>              | 9.22 | (7.38) | 383.68  | 0.019 | 1190.56 | 198.22 | 6.006256 | R,R  | 278.33 | 90.12 | 3.088438 | 0.32 | 1.94 |
| 13 | Calciumacetate                    |      | 3.29   | 176.18  | 0.019 | 1188.17 | 198.22 | 5.994198 | Meso | 268.57 | 90.12 | 2.980138 | 0.31 | 2.01 |
| 14 | Calciumacetate                    |      | 3.29   | 176.18  | 0.019 | 1189.41 | 198.22 | 6.000454 | R,R  | 269.8  | 90.12 | 2.993786 | 0.31 | 2.00 |
| 15 | Zinc acetate                      |      | 4.26   | 219.5   | 0.019 | 1188.58 | 198.22 | 5.996267 | Meso | 269.24 | 90.12 | 2.987572 | 0.32 | 2.01 |
| 16 | Zinc acetate                      |      | 4.37   | 219.5   | 0.020 | 1196.59 | 198.22 | 6.036676 | R,R  | 271.48 | 90.12 | 3.012428 | 0.33 | 2.00 |

### Experimental: exact weight of starting materials polyester synthesis

|                               |         |                                   |                                                                             |
|-------------------------------|---------|-----------------------------------|-----------------------------------------------------------------------------|
| DMT                           | 2,3-BDO |                                   | Zr(OBu) <sub>4</sub> 80% in butanol (% based on DMT)                        |
| 5.24 g 0.027 mol <b>1 eq.</b> | Meso    | 4.50 g 0.050 mol <b>1.85 eq.</b>  | 9.7 μL, 10.379 mg corrected 80wt% 8.3032 mg, 0.021641mmol, <b>0.08 mol%</b> |
| 5.24 g 0.027 mol <b>1 eq.</b> | R,R     | 4.50 g 0.050 mol <b>1.85 eq.</b>  | 9.7 μL, 10.379 mg corrected 80wt% 8.3032 mg, 0.021641mmol, <b>0.08 mol%</b> |
| DMT                           | 2,3-BDO |                                   | Ti(OBu) <sub>4</sub> (% based on DMT)                                       |
| 5.84 g 0.030 mol <b>1 eq.</b> | Meso    | 4.979 g 0.055 mol <b>1.84 eq.</b> | 15 μL <b>0.15 mol%</b>                                                      |
| 5.71 g 0.029 mol <b>1 eq.</b> | R,R     | 4.834 g 0.054 mol <b>1.82 eq.</b> | 15 μL <b>0.15 mol%</b>                                                      |

## GPC

Below a section of GPC spectra, integrated and the summary of the integrated peaks, including  $\langle Mn \rangle$ ,  $\langle Mw \rangle$  and dispersity index obtained from the software. These are all measurements of the final polyesters of P23BT. First the results of the section on “Meso- and R,R-2,3-BDO-based P23BT: Zr and Ti butoxide” are shown of which the titanium catalyzed P23BT experiments had been measured in duplicate, which are the first 4 spectra shown, followed by the Zr-catalyzed 2,3-BDO (only measured once, thus one spectra per P23BT.) The average of the duplicates and the single measurements for Zr-catalyzed results are all summarized in the main text table 2. The last two spectra shown in this section belong to experiments performed as described in the section “P23BT synthesis using a mixture of 2,3-BDO and La or Zn catalyst” and the GPC results are used for table 1 in the main text.

### XIII. P23BT using $Ti(OBu)_4$ & Meso-2,3-BDO, 2 measurements

| Peak # | RT (min) | Mn (g/mol) | Mw (g/mol) | PD   | Mp (g/mol) |
|--------|----------|------------|------------|------|------------|
| 1      | 14.197   | 16331      | 36310      | 2.22 | 37731      |
| 2      | 17.323   | 1216       | 1221       | 1    | 1212       |
| 3      | 17.646   | 793        | 827        | 1.04 | 901        |

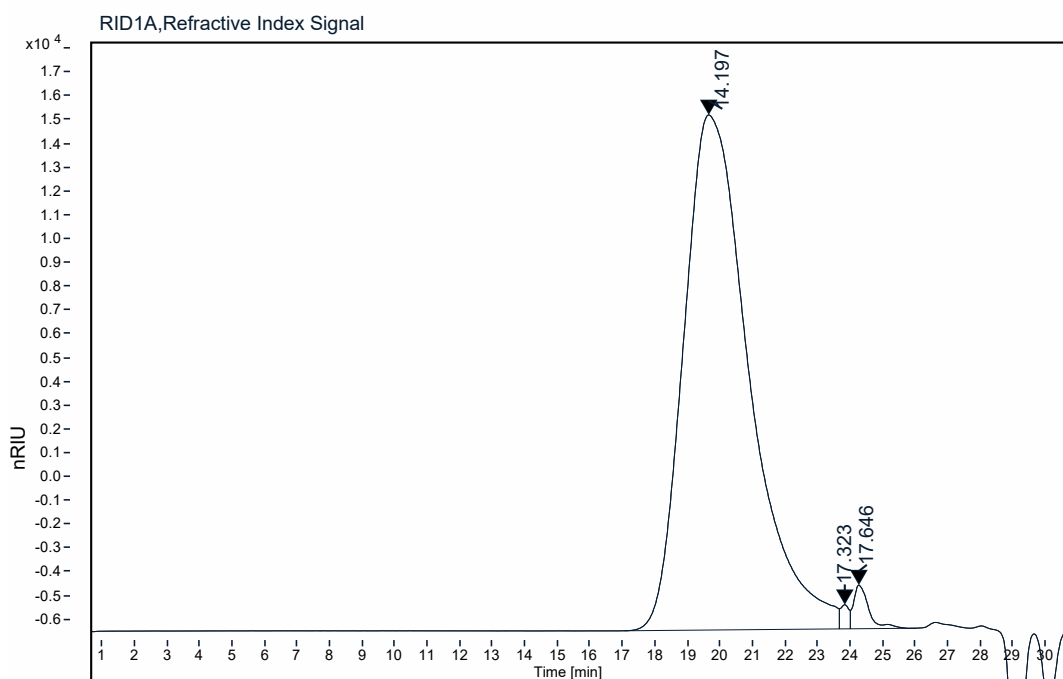

| Peak # | RT (min) | Mn (g/mol) | Mw (g/mol) | PD   | Mp (g/mol) |
|--------|----------|------------|------------|------|------------|
| 1      | 14.236   | 15844      | 36380      | 2.3  | 36190      |
| 2      | 17.341   | 1196       | 1202       | 1.01 | 1196       |
| 3      | 17.645   | 766        | 812        | 1.06 | 901        |

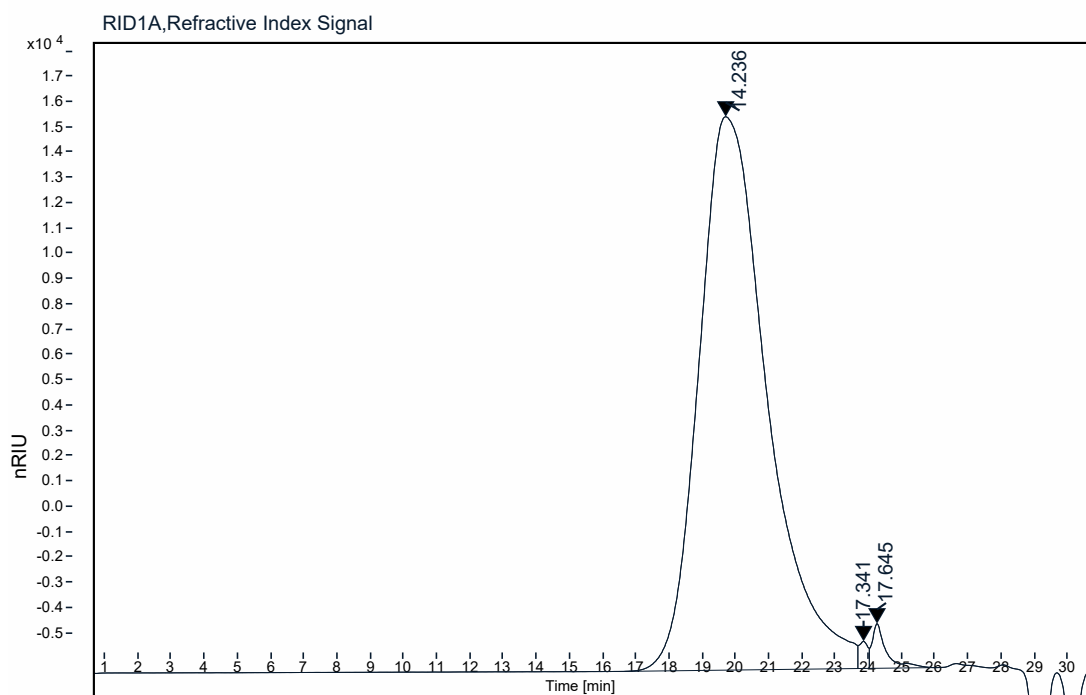

#### XIV. P23BT using $Ti(OBu)_4$ & R,R-2,3-BDO, 2 measurements

| Peak # | RT (min) | Mn (g/mol) | Mw (g/mol) | PD   | Mp (g/mol) |
|--------|----------|------------|------------|------|------------|
| 1      | 14.743   | 9694       | 20646      | 2.13 | 19978      |
| 2      | 17.599   | 859        | 877        | 1.02 | 938        |
| 3      | 18.31    | 449        | 458        | 1.02 | 497        |

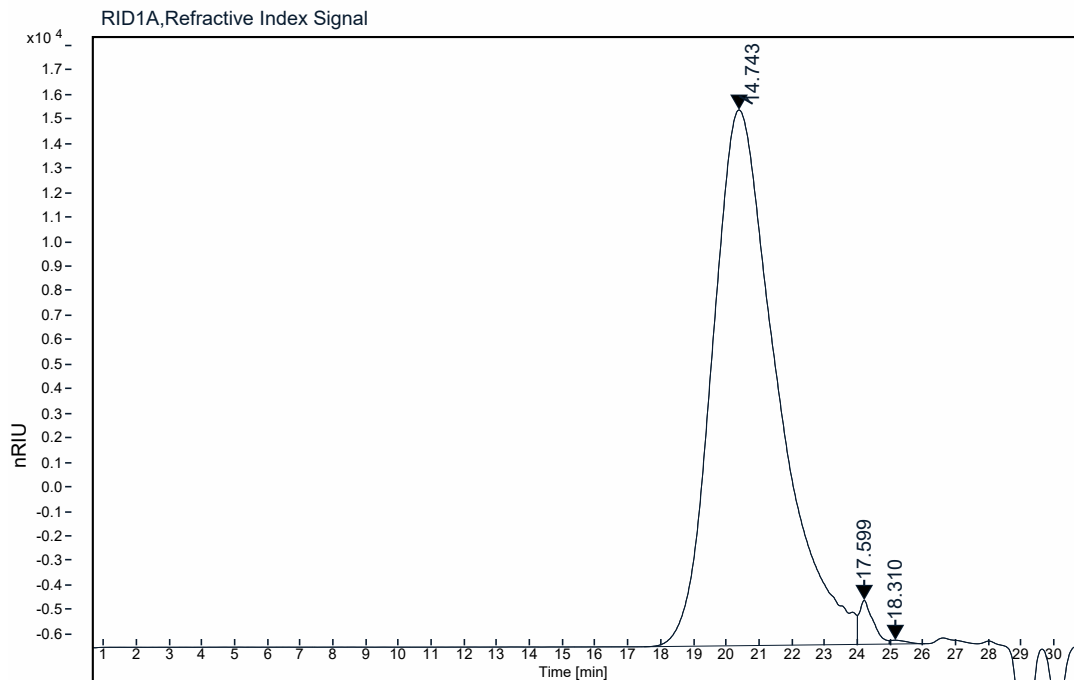

| Peak # | RT (min) | Mn (g/mol) | Mw (g/mol) | PD   | Mp (g/mol) |
|--------|----------|------------|------------|------|------------|
| 1      | 14.755   | 10475      | 20508      | 1.96 | 19812      |
| 2      | 17.083   | 1421       | 1425       | 1    | 1547       |
| 3      | 17.339   | 1180       | 1183       | 1    | 1204       |
| 4      | 17.608   | 733        | 801        | 1.09 | 931        |

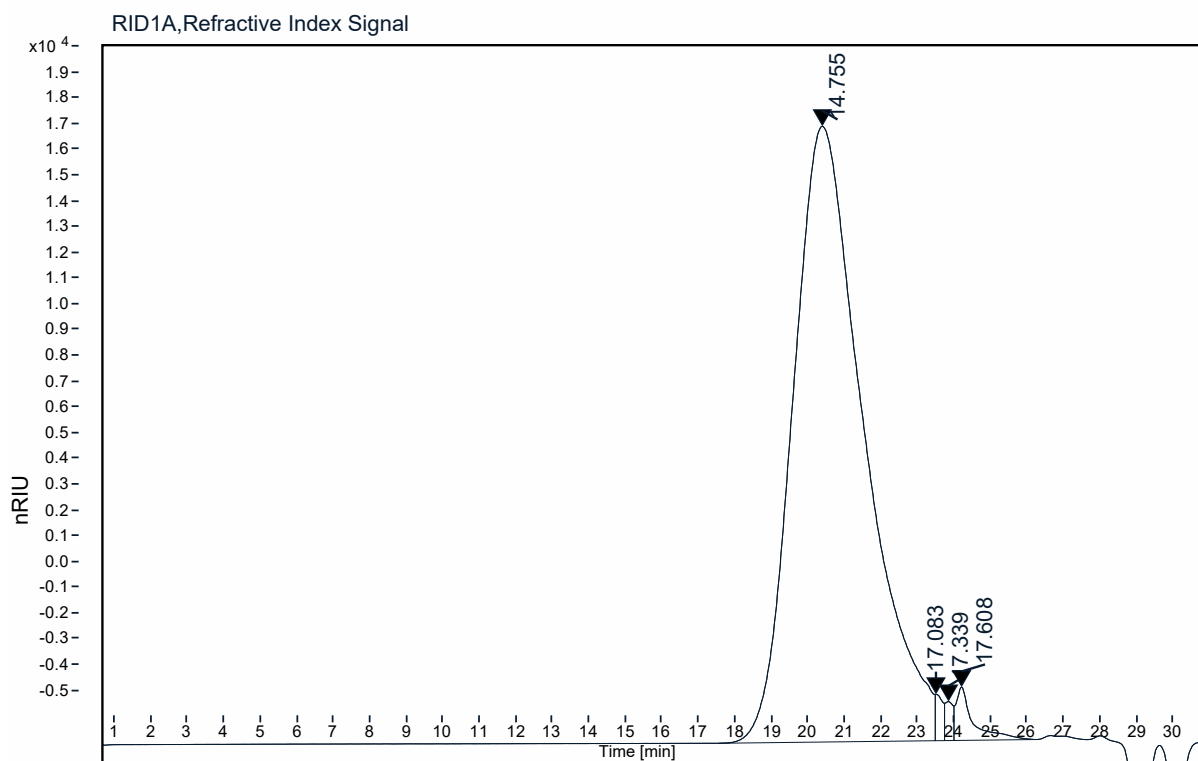

### XV. P23BT using Zr(OBu)<sub>4</sub> & Meso-2,3-BDO

| Peak # | RT (min) | Mn (g/mol) | Mw (g/mol) | PD   | Mp (g/mol) |
|--------|----------|------------|------------|------|------------|
| 1      | 15.933   | 2918       | 5159       | 1.77 | 5135       |

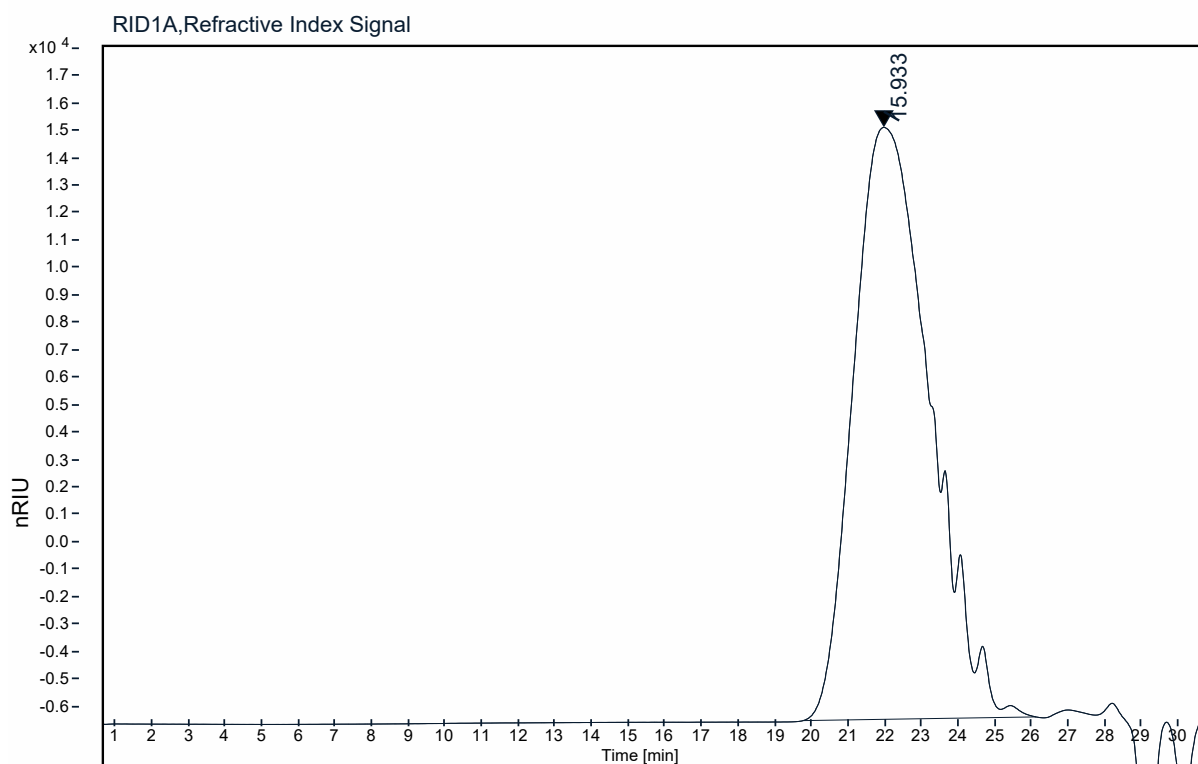

## XVI. P23BT using $Zr(OBu)_4$ & R,R-2,3-BDO

| Peak # | RT (min) | Mn (g/mol) | Mw (g/mol) | PD   | Mp (g/mol) |
|--------|----------|------------|------------|------|------------|
| 1      | 15.923   | 2686       | 5065       | 1.89 | 5176       |

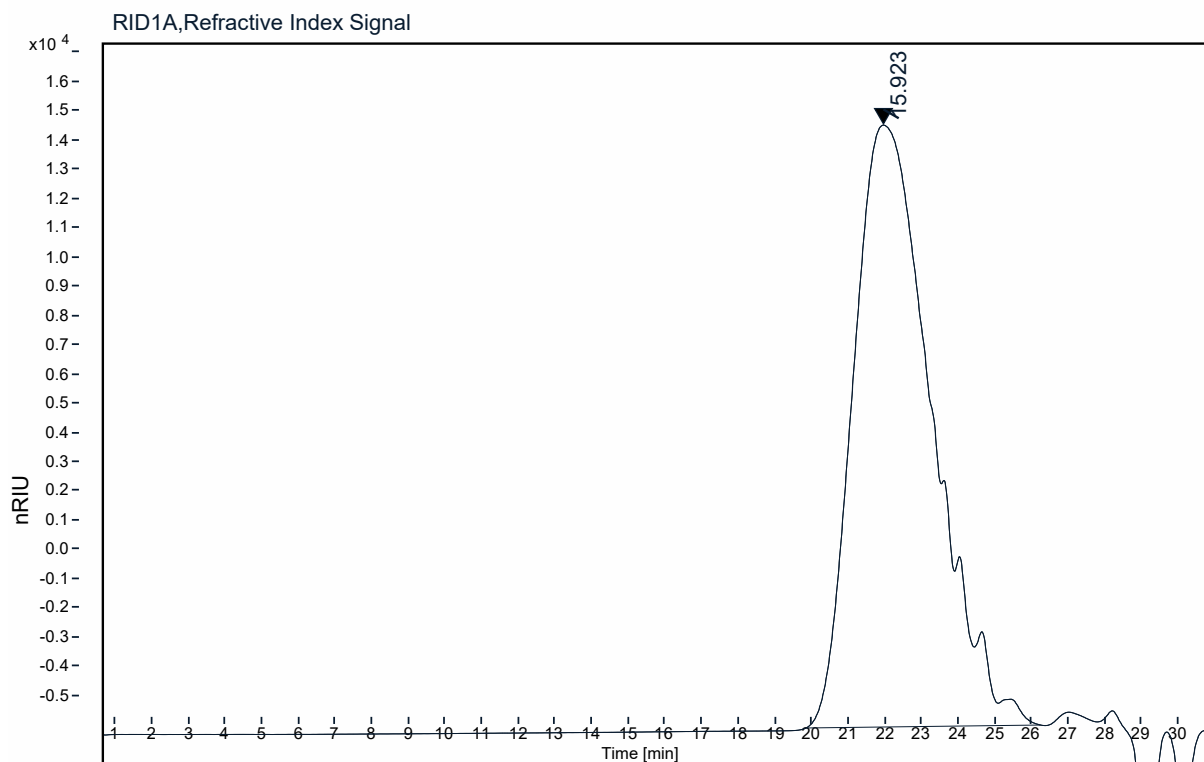

## XVII. P23BT using $La(acac)_3$

| Peak # | RT (min) | Mn (g/mol) | Mw (g/mol) | PD   | Mp (g/mol) |
|--------|----------|------------|------------|------|------------|
| 1      | 17.419   | 939        | 1420       | 1.51 | 1117       |
| 2      | 19.786   | 83         | 96         | 1.16 | 124        |

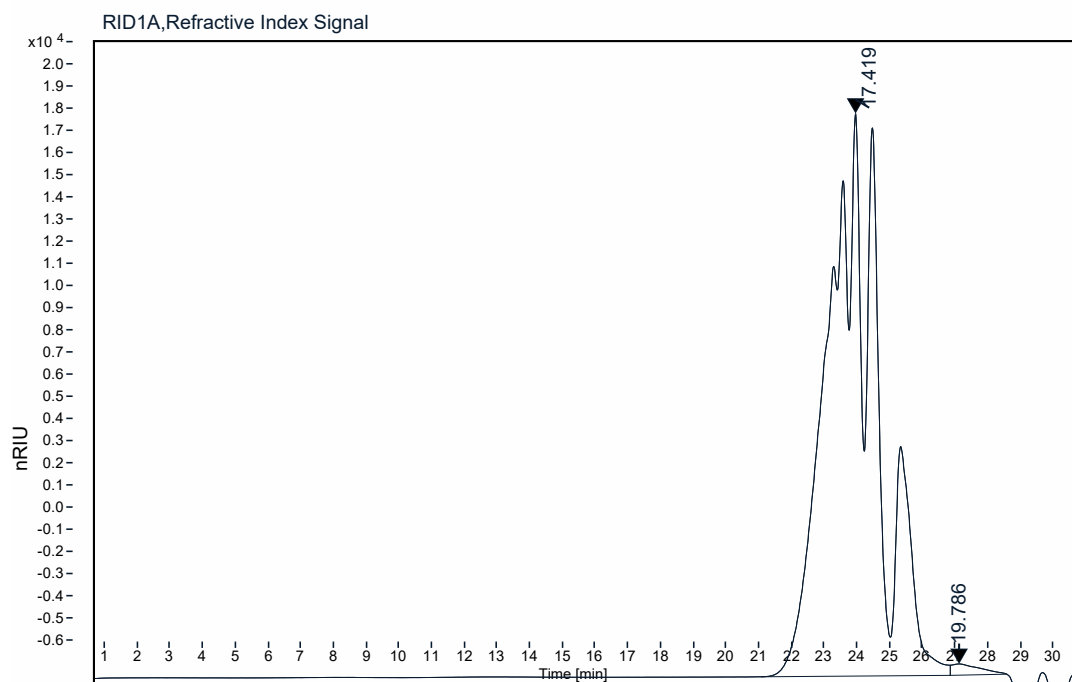

## XVIII. P23BT using $Zn(OAc)_2 \cdot H_2O$

| Peak # | RT (min) | Mn (g/mol) | Mw (g/mol) | PD   | Mp (g/mol) |
|--------|----------|------------|------------|------|------------|
| 1      | 15.023   | 6318       | 13632      | 2.16 | 14417      |

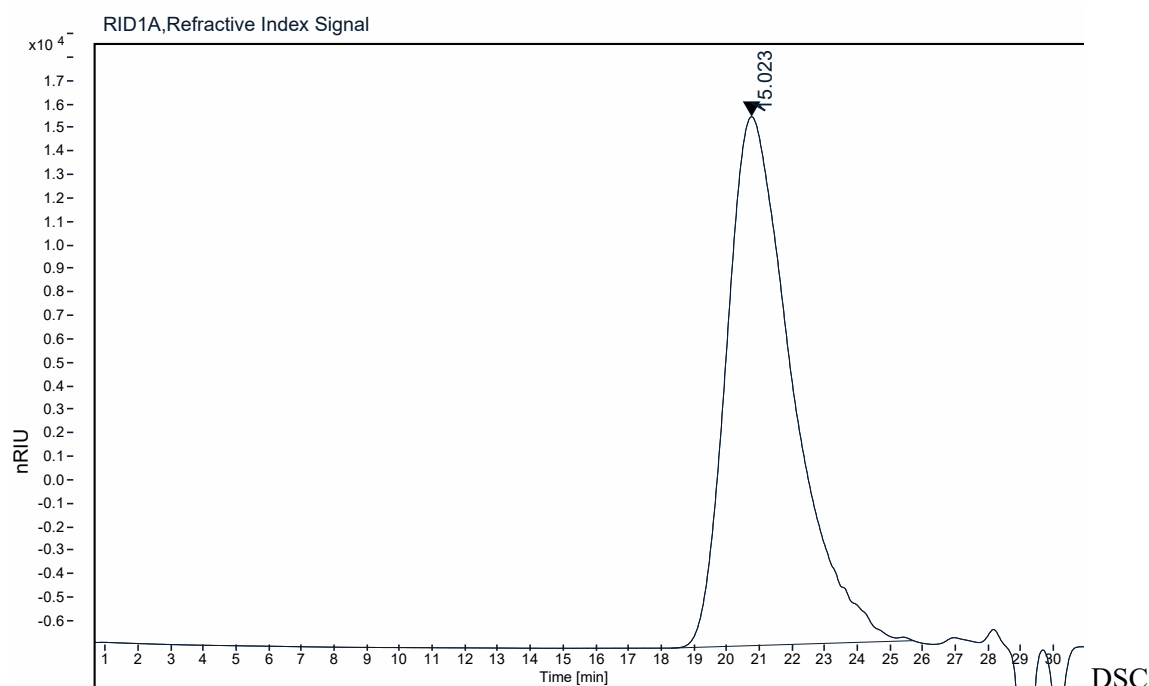

## DSC

## XIX. DSC curves P23BT polyesters synthesized using either $Zr(OBu)_4$ or $Ti(OBu)_4$

| Catalyst    | 2,3-BDO     | $T_g$ ( $^{\circ}C$ ) | $T_m$ |
|-------------|-------------|-----------------------|-------|
| $Zr(OBu)_4$ | <i>meso</i> | 81                    | -     |
| $Zr(OBu)_4$ | R,R         | 76                    | -     |
| $Ti(OBu)_4$ | <i>meso</i> | 120                   | -     |
| $Ti(OBu)_4$ | R,R         | 115                   | -     |

Below a table of the four P23BT polyesters synthesized using either  $Zr(OBu)_4$  or  $Ti(OBu)_4$ , with the relevant DSC results (which are shown in the main text in table 2).

These results were based on the second cycle of the regular DSC program, the relevant curves shown in the figure below:

Method (full program:  $N_2$  50 ml/min)

[1] 25  $^{\circ}C$ , 5 min

[2] 25  $\rightarrow$  250  $^{\circ}C$ : 10  $^{\circ}C$ /min

[3] 250  $\rightarrow$  25  $^{\circ}C$ : -10  $^{\circ}C$ /min

[4] 25  $^{\circ}C$ , 5 min

[5] 25  $\rightarrow$  300  $^{\circ}C$ : 10  $^{\circ}C$ /min

[6] 300  $\rightarrow$  25  $^{\circ}C$ : -40  $^{\circ}C$ /min

Curves in order of top to bottom:

1<sup>st</sup> cycle: P23BT: Zr(OBu)<sub>4</sub> & meso-2,3-BDO

1<sup>st</sup> cycle: P23BT: Zr(OBu)<sub>4</sub> & R,R-2,3-BDO

1<sup>st</sup> cycle: P23BT: Ti(OBu)<sub>4</sub> & meso-2,3-BDO

1<sup>st</sup> cycle: P23BT: Ti(OBu)<sub>4</sub> & R,R-2,3-BDO

2<sup>nd</sup> cycle: P23BT: Zr(OBu)<sub>4</sub> & meso-2,3-BDO: T<sub>g</sub> midpoint ISO: 81.32 °C

2<sup>nd</sup> cycle: P23BT: Zr(OBu)<sub>4</sub> & R,R-2,3-BDO: T<sub>g</sub> midpoint ISO: 75.81 °C

2<sup>nd</sup> cycle: P23BT: Ti(OBu)<sub>4</sub> & meso-2,3-BDO: T<sub>g</sub> midpoint ISO: 120.97 °C

2<sup>nd</sup> cycle: P23BT: Ti(OBu)<sub>4</sub> & R,R-2,3-BDO: T<sub>g</sub> midpoint ISO: 114.97 °C

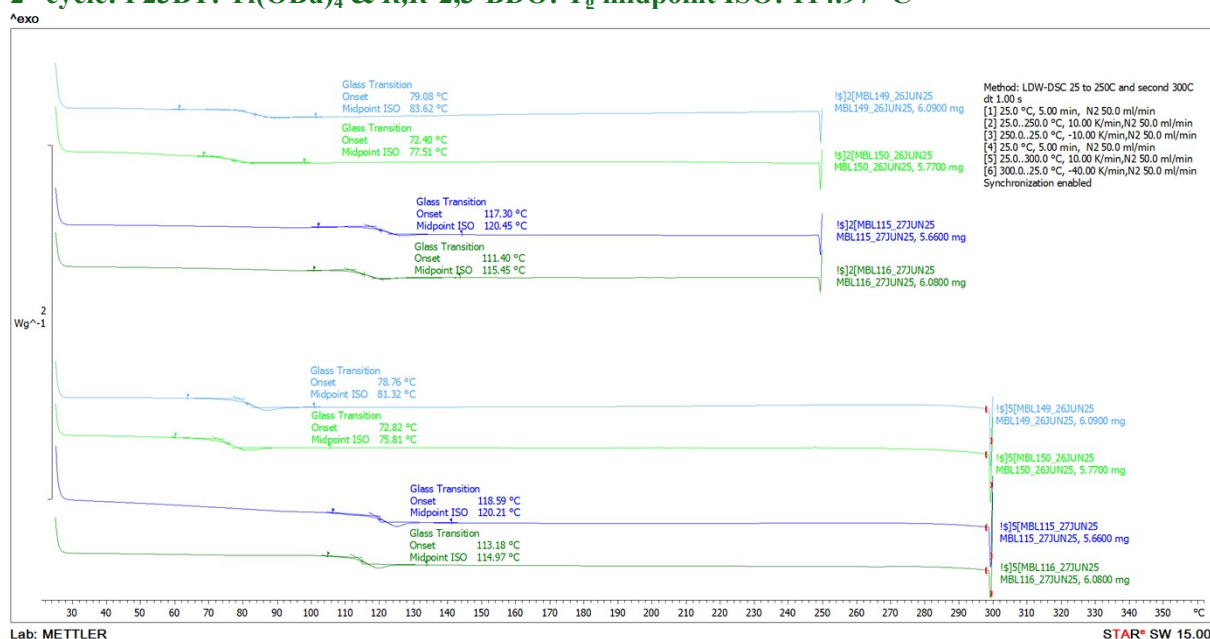

## XX. Annealing “P23BT synthesized using Ti(OBu)<sub>4</sub> & R,R-2,3-BDO”

Annealing programmes were applied using the same DSC set-up, below the figure showing the curves obtained using the annealing programmes applied on “P23BT synthesized using Ti(OBu)<sub>4</sub> & R,R-2,3-BDO”.

Curves and method in order from top to bottom:

**Method in red (N<sub>2</sub> 50 ml/min for full program, steps in brackets [])**

[1] 25 °C, 3 min; [2] 25 °C, 3 min; [3] 25 → 250 °C, 5 °C/min; [4] 250 → 140 °C, -1 °C/min; [5] 140 °C, 480 min; [6] 140 → 25 °C, -5 °C/min; [7] 25 → 260 °C, 5 °C/min; [8] 260 → 25 °C, -50 °C/min

1. 1<sup>st</sup> cycle “red method” for P23BT synthesized using Ti(OBu)<sub>4</sub> & R,R-2,3-BDO

2. 2<sup>nd</sup> cycle “red method” for P23BT synthesized using Ti(OBu)<sub>4</sub> & R,R-2,3-BDO

**Method in orange (N<sub>2</sub> 50 ml/min for full program)**

[1] 25 °C, 3 min; [2] 25 → 120 °C, 10 °C/min; [3] 120 → 260 °C, 0.5 °C/min; [4] 260 → 130 °C, -0.5 °C/min; [5] 130 °C, 5 min; [6] 130 → 25 °C, -50 °C/min; [7] 25 → 260 °C, 10 °C/min; [8] 260 → 25 °C, -50 °C/min

3. 1<sup>st</sup> cycle “orange method” for P23BT synthesized using Ti(OBu)<sub>4</sub> & R,R-2,3-BDO

4. 2<sup>nd</sup> cycle “orange method” for P23BT synthesized using Ti(OBu)<sub>4</sub> & R,R-2,3-BDO

**Method in purple (N<sub>2</sub> 50 ml/min for full program)**

[1] 25 °C, 3 min; [2] 25 → 120 °C, 5 °C/min; [3] 120 → 260 °C, 0.1 °C/min; [4] 260 → 110 °C, -0.1 °C/min; [5] 110 °C, 5 min; [6] 110 °C → 25 °C, -50 °C/min; [7] 25 → 260 °C, 10 °C/min; [8] 260 → 25 °C, -50 °C/min

5. 1<sup>st</sup> cycle “orange method” for P23BT synthesized using Ti(OBu)<sub>4</sub> & R,R-2,3-BDO

6. 2<sup>nd</sup> cycle “orange method” for P23BT synthesized using Ti(OBu)<sub>4</sub> & R,R-2,3-BDO

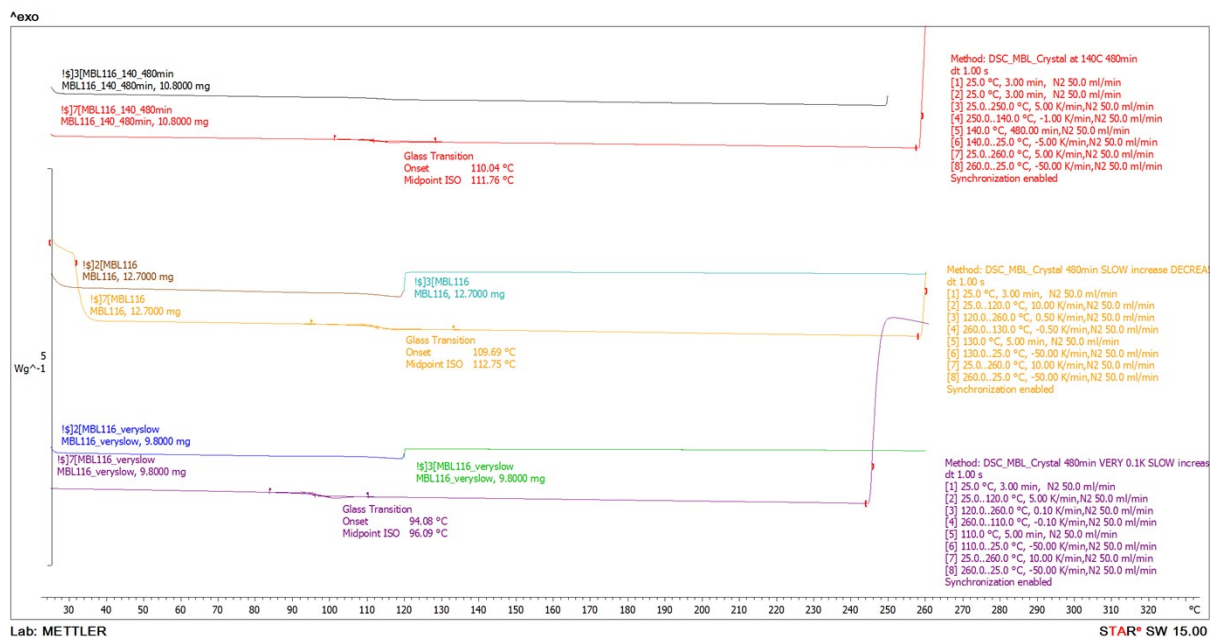

Besides the “P23BT synthesized using Ti(OBu)<sub>4</sub> & R,R-2,3-BDO”, an annealing program was also applied on the analogous polyester with meso-2,3-BDO instead of R,R-2,3-BDO, thus “P23BT synthesized using Ti(OBu)<sub>4</sub> & meso-2,3-BDO”, this is shown in the figure below.

## XXI. Annealing “P23BT synthesized using Ti(OBu)<sub>4</sub> & meso-2,3-BDO”

Method(N<sub>2</sub> 50 ml/min for full program)

[1] 25 °C, 3 min;[2] 25 → 260 °C, 10 °C/min;[3] 260 → 130 °C, -0.5 °C/min;[4] 130 °C, 480 min;[5] 230 → 25 °C, -50 °C/min [6] 25 → 260 °C, 10 °C/min;[7] 260 → 25 °C, -50 °C/min

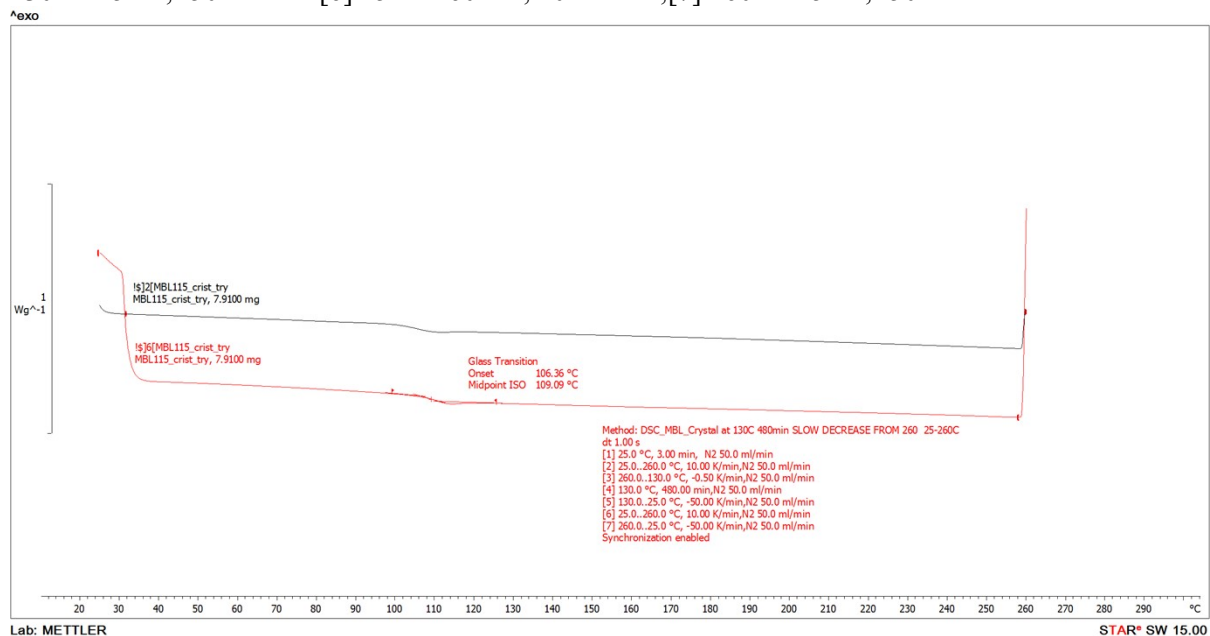

## TGA (original curve in paper)

**P23BT using  $\text{Ti}(\text{O}i\text{Bu})_4$  & meso-2,3-BDO: derivative of TGA**

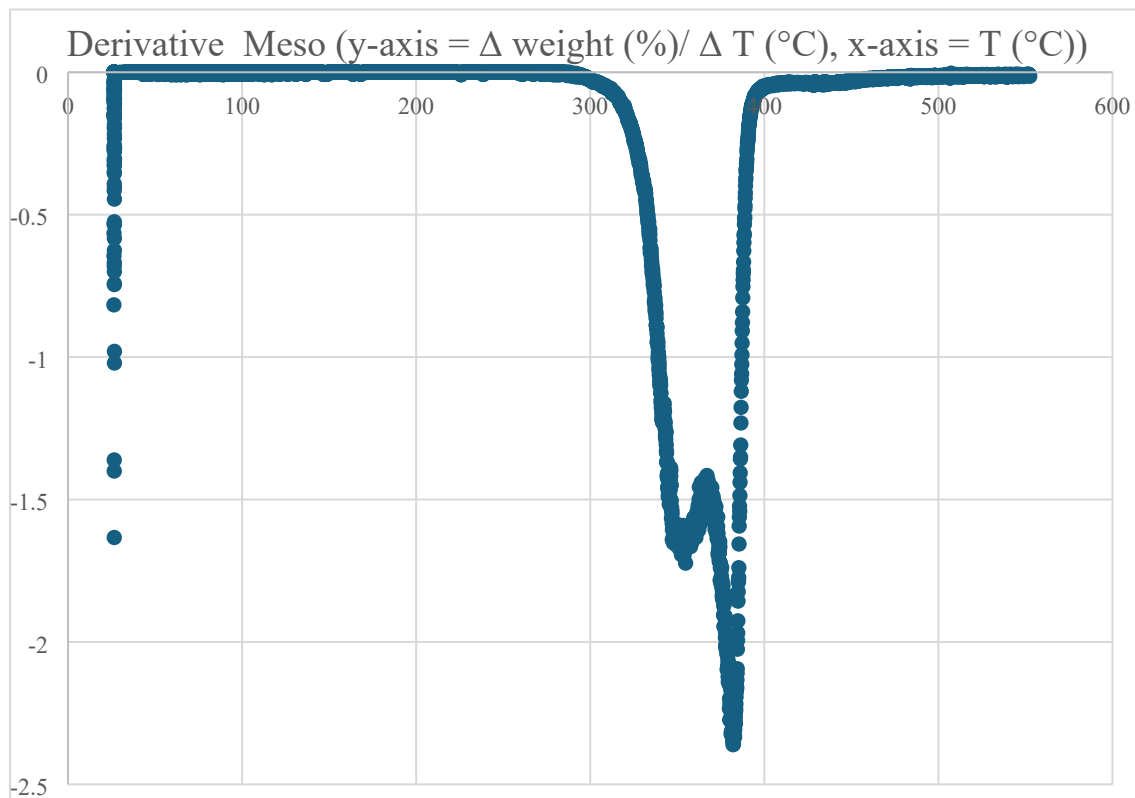

**P23BT using  $\text{Ti}(\text{O}i\text{Bu})_4$  & Meso-2,3-BDO: derivative of TGA ZOOM**

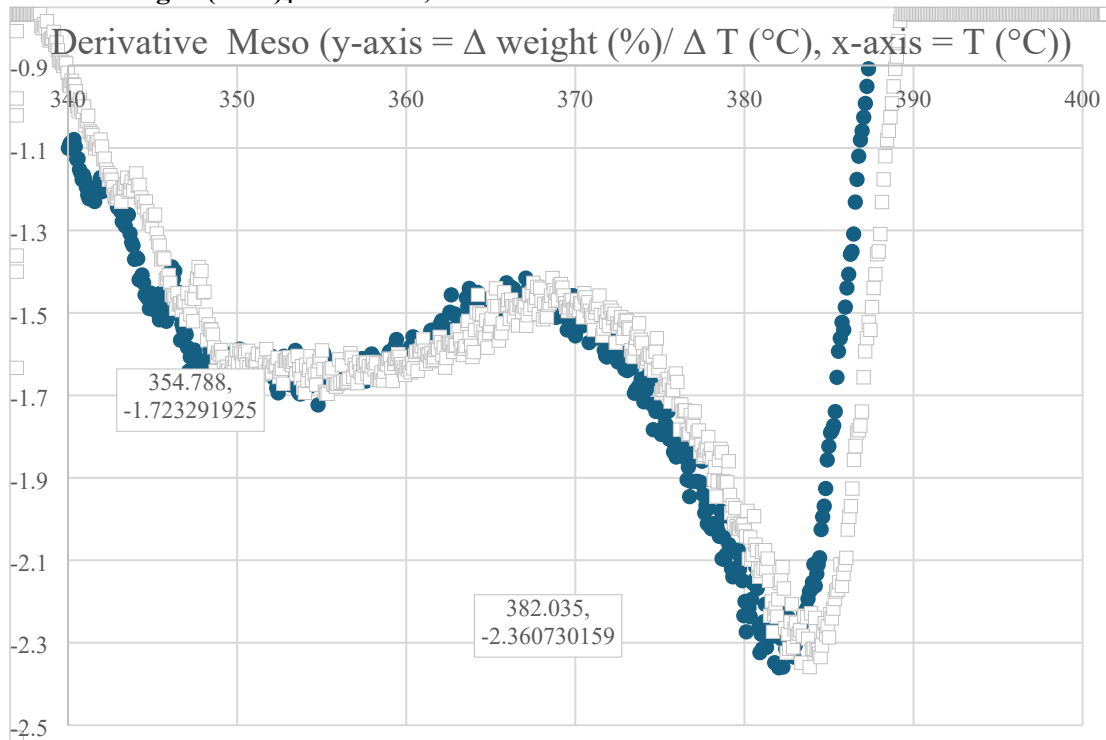

**P23BT using Ti(OBu)<sub>4</sub> & R,R-2,3-BDO: derivative of TGA**

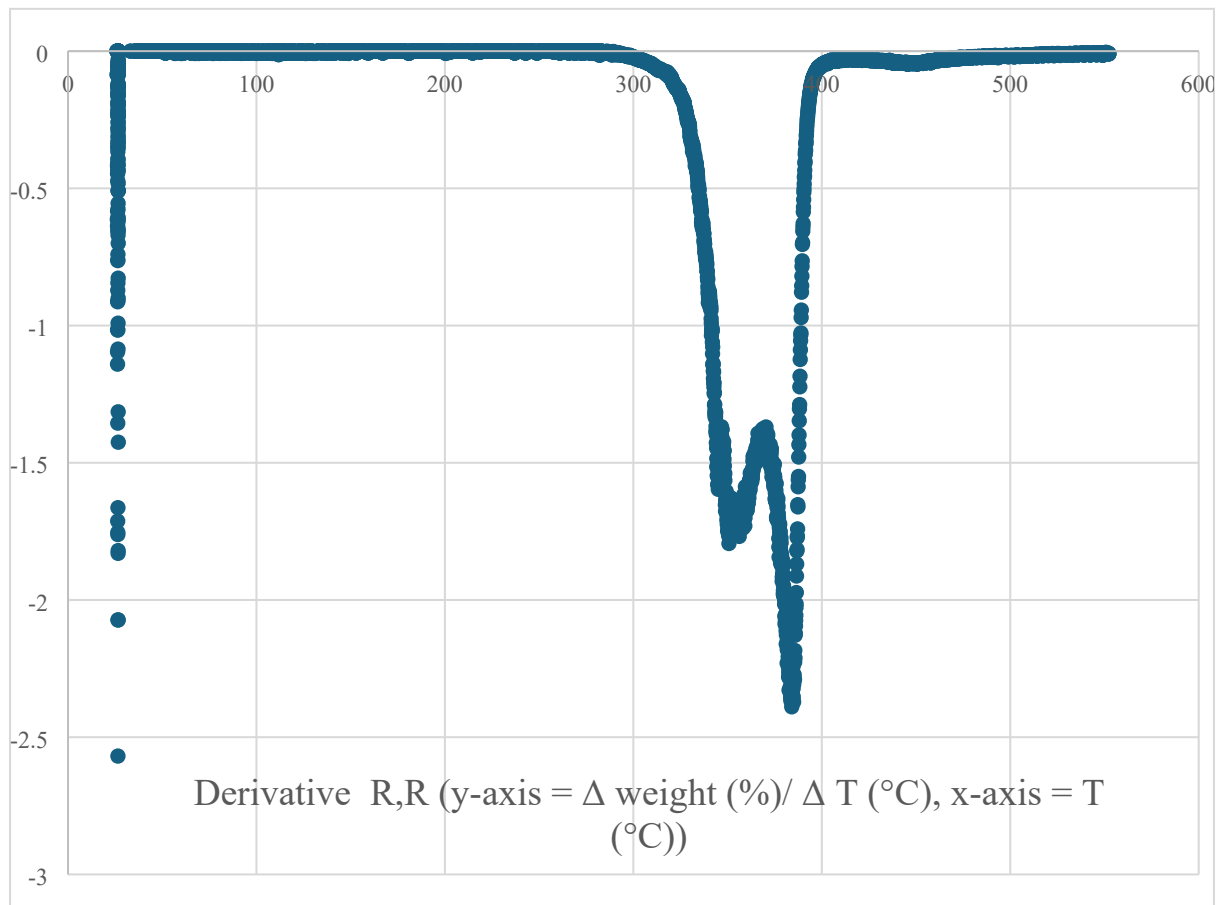

**P23BT using Ti(OBu)<sub>4</sub> & R,R-2,3-BDO: derivative of TGA ZOOM**

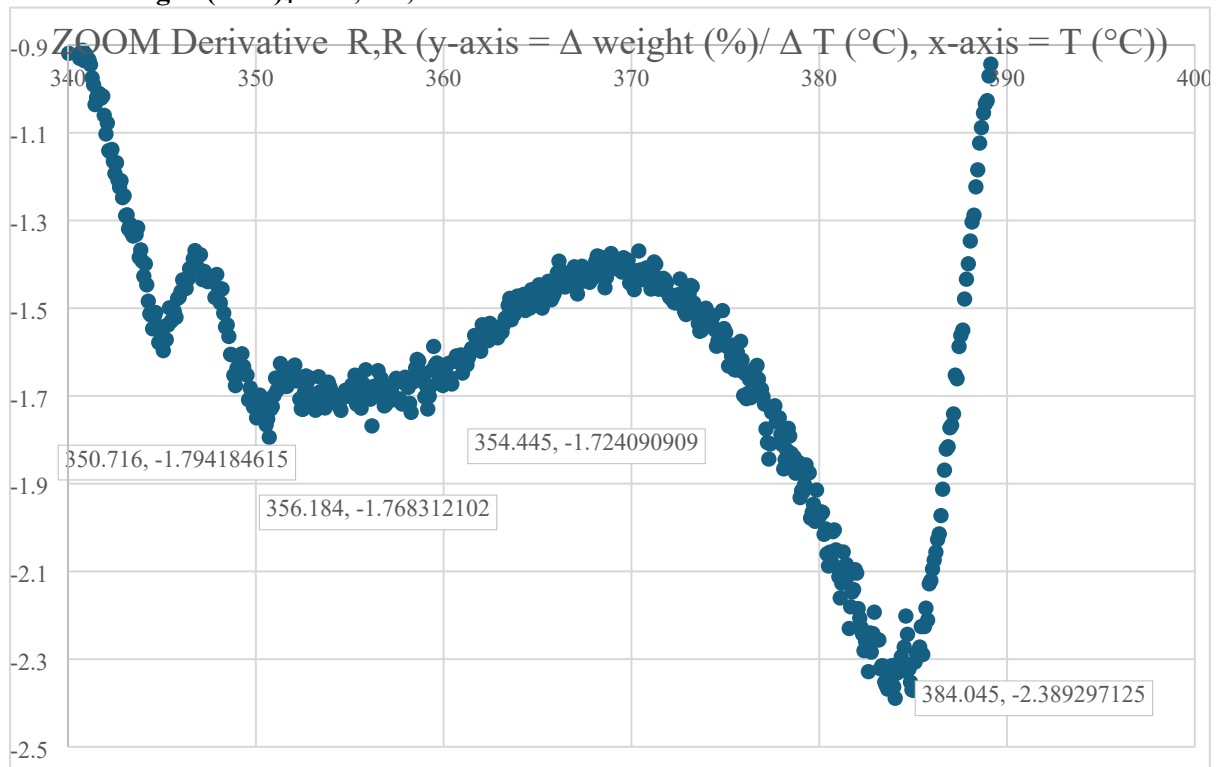

Supplement: d6su00127k1.pdf [file d6su00127k1.pdf]
